# Supplementary material for: Genetic and climatic factors in the dispersal of Anatomically Modern Humans Out of Africa
Source: Research Square preprint supplement (doi:10.21203/rs.3.rs-800178/v1), 2021-08-24
Supplement: Supplementary file 1 [file 2185ba786aa212b140e6f1b9.xlsx]

## Sheet: 1. Driver genes
Functional class	Selected gene [1]	Constraint [LOUEF] [2]	Description [3]	Molecular Function [4]	Human deletion phenotype [5]	Animal haploinsufficiency and/or homozygous deletion phenotype [6]	GWAS Association [7]	Key literature [8]
Neurological	AMBRA1	0.14	protein; intracellular; WD40 repeat protein	Autophagy	premature lethality; neuro-pathology; autism	Embryonic lethality; neuro-pathology; autism exencephaly; spina bifida	GWAS for autism	[PMID: 17589504]; [PMID:24904333]; [PMID:21743397]
Neurological	ARFGEF1	0.143	protein; intracellular; GEF for GTPase	Vesicle trafficking	Lennox-Gastaut Syndrome [developmental retardation]			[PMID: 31678406]; [PMID: 31678406]
Neurological	COL4A3BP	0.364	protein; intracellular; Good Pastures antigen binding protein	ceramide transport; basement membrane assembly	Embryonic lethality; developmental retardation			[PMID: 25533962]; [PMID: 25356899]; [PMID: 19139267]
Neurological	DOCK3	0.158	protein; intracellular; DOCK B family of GEF's	axonal outgrowth;	developmental retardation; Spontaneous limb weakness; ataxia	abnormal neuro architecture		[PMID: 28195381]; [PMID: 19129390]
Neurological	DOK5	0.834	protein; intracellular; Neurotrophin family protein	signal transduction; neuronal survival, development, function	nd **	ND		[PMID: 23954828]; [PMID: 11470823]
Neurological	MPP6	0.381	protein; intracellular; membrane associated; MAGUK family;	myelin fomation	Spontaneous hyper-myelination peripheral nerves			[PMID: 30357511]
Neurological	NFASC	0.215	protein; cell surface; neurofascin; IG-family adehsion molecule	organises axon initial segment; site of action potential initiation	premature lethality; motor function impairment and intellectual disability;	Spontaneous severe ataxia, motor paresis, early lethality.		[PMID: 28940097]; [PMID: 30124836]; [PMID: 19185024]
Neurological	TAF15	0.398	protein; intracellular; TATA box protein associated factor; FET family RNA binding protein	Component of the transcription initation factor TFIID complex; role in synaptic plasticity	motor neuron disease; amyotrophic lateral sclerosis; frontotemporal dementia	Spontaneous neuro-degeneration phenotype in drosophilia		[PMID: 21438137]; [PMID: PMID: 30357887]; [PMID: 28889094]; [PMID: 22065782]
Neurological	TMEM232	1.078	protein; intracellular; TMEM trans-membrane family	Unknown function	GWAS association to synaptic transport and Alzheimers	ND	GWAS association to synaptic transport and Alzheimers	[PMID: 31640099]
Neurological	WWOX	1.532	protein; intracellular; enzyme; oxidoreductase	Transcription regulator; CNS development & function	premature lethality; neurodegeneration; spinocerebellar ataxia; epileptic encephalopathy	Early lethality; spontaneous neuro-degeneration and seizures		[PMID: 17470496]; [PMID: 24369382]; [PMID: 25411445]
Development	CAND1	0.101	protein; intracellular; F-box exchange factor	Cell cycle; regulates SCF complex	ND	SCF molecular complex conserved across yeast, plants, insects and vertebrates		[PMID: 23528706]; [PMID: 10508527]
Development	CCDC138	0.913	protein; intracellular; coiled coiled domain containing;	cilia basal body component	ND	ND		[PMID: 28596423]
Development	CCNG2	0.756	protein; intracellular; cyclin G2 [atypical cyclin]	negative regulator cell cycle	ND	Exhibit sensitivity to disease triggers.		[PMID: 30420966]
Development	DNAH6	0.573	proten; intracellular; axonemal; dynein motor component	Cilia function; force generator for cilia motility	primary ciliary dyskinesia	Deletion in zebrafsh leads to body pattern malformations [dysregulated orientatin of heart and gut looping].		[PMID: 8812413]; [PMID: 26918822]
Development	DNAH7	0.837	proten; intracellular; axonemal protein; dynein motor component	Cilia function; force generator for cilia motility	primary ciliary dyskinesia	ND		[PMID: 11877439]; PMID: 15937072]
Development	FANCD2	0.886	protein; intracellular; cytoplasmic; Fanconi anemia complementation group	DNA damage [ATM response pathway]	premature lethality; developemental abnormalities	Early lethality; developmental abnormalities; and dysregulated control of cell death pathways		[PMID: 24237972]; [PMID: 20506303]; [PMID: 31078270]
Development	FBN1	0.049	protein; Pro-protein produces mature glycoprotein of the fibrillin family [fibrillin 1]; & asprosin [hormone]	Fibrillin glycoprotein: structural component of connective tissue; Asporin hormone: regulates glucose homeostasis	premature lethality; premature ageing; developmental abnormalities	Spontanous lethality; with Marfaran-like symptoms		[PMID: 1852208]; [PMID: 1569206]; [PMID: 9326947]; [PMID: 21152435]
Development	FBXO15	0.424	protein; intracellular; F Box domain containing; interacts with SCF complex [*relates to CAND1]	regulate SCF ubiquitin editing complex [cell cycle]	ND	No gross developmental defect		[PMID: 12665572]; [PMID: 16904174]
Development	GTSE1	0.738	protein; intracellular;	Cell cycle; DNA replication; chromosome alignment	ND	ND		[PMID: 10974554]
Development	TP53BP1	0.253	protein; intracellular; P53 binding protein	DNA damage response [main cellular check point for cell cycle and apoptosis]	developmental defects; cancer and immune sensitivities	Growth retardation; Extreme sensitivity [lethality] to irradiation; increased cancers; immune deficiencies [impaired B cell antibody responses]		[PMID: 12578828]; [PMID: 12640136]
Metabolism	FMO2	1.06	protein; intracellular; enzyme; flavin-containing monooxygenase	Enzyme involved in metabolism [detoxification] of drugs and xenobiotics.	ND	ND		[PMID: 1417778]; [PMID: 31873300]
Metabolism	GALNT5	0.981	protein; intracellular; membrane bound; enzyme; N-acetylgalactosaminyl transferase	Protein glycoslation of proteins [mucin-type O]; typically cell wall products or secreted proteins; may be significant in gut biology	ND	ND		[PMID: 20977886]
Metabolism	MLPH	0.9	protein; intracellular; RAB binding effector protein [RAS superfamily]	interacts with RAS GTPase; tethers pigment organelles to actin cyto skel in melanocytes for transport; pigmentation	Griscelli syndrome [hypopigmentation]	Gene for 'dilute' phenotype in cats; "leaden" phenotype in mice. Alters coat colour.		[PMID: 12148598]; [PMID: 16860533]; [PMID: 11504925]
Metabolism	PNLIPRP3	1.185	protein; intracellular; homology with pancreatic lipase family	Lipases hydrolyze fats [mediate fat digestion]	ND	ND		ND
Metabolism	PPARD	0.19	protein; intracellular; PPAR family; PPAR delta	Nuclear hormone receptor; mediates nutrient response and fat metabolism.	ND	Embryonic lethality; surviving mice ~10-15% smaller; reduced gonadal fat; metabolically less active and glucose intolerant [pre diabetes phenotype]		[PMID:16492734]; [PMID: 12705865]; [PMID: 10866668]
Metabolism	SLC7A1	0.267	protein; cellular membrane receptor; SLC7 family; also called REC1;	Nutrient transporter for cationic amino acids [Arg, Lys, Orn] involved in urea pathway	ND	ND		[PMID: 1348489]
Metabolism	SMCO2	1.516	protein; intracellular;	ND	ND	ND	GWAS association with fat deposition and metabolism	[PMID: 30925743]
Metabolism	TBC1D7	1.608	protein; intracellular; regulatory component of the TSC-TBC complex	Energy sensing pathway responsive molecular complex; involved in cell signalling; regulates TSC1-TSC2 complex activation	macrocephaly/megalencephaly syndrome; enlrged cranium; dysmorphic face; intellectual disability; can have other body malformations; may be linked to cancer;intellectual disability	n/d		[PMID: 23687350]
Metabolism	TMCC1	0.386	protein; intracellular; ER associated	Tethers proteins to the ER; regulates fission events beween endosomes and ER.	ND	ND	GWAS association for body fat disposition and adiposity.	[PMID: 30220460]; [PMID: 2434551]
Reproduction	ELMO1	0.333	protein; intracellular; cytoplasmic; kinase	Involved in cytoskeletal function for phagocytosis; specifically required for removal of apoptotic germ [sperm] cells	ND	Testiclar pathology; decreased sperm output; fertilization defects, sperm entry to oocytes		[PMID: 20844538]; [PMID: 31575859]
Reproduction	PRELID2	1.497	protein; intracellular; PRELI domain containing family; may locate to miochondria	ND	ND	ND	GWAS association for reproduction traits in animals; involved in embryo development	[PMID: 29411893]; [PMID: 32939704]; [PMID: 19847657]
Angiogenisis	BCAS3	0.467	protein; intracellular	Cytoskeletal angiogenesis; involved in actin organisation	ND	Embryonic lethality; severe vascular pathology [avascular]		[PMID: 22300583]; [PMID: 29618843]
Unknown	LINCO1153		long non coding RNA	ND	ND	ND
FOOTNOTES:
1	Single gene sweep; gene name from OMIM
2	Constraint definition based on LOUEF score whereby < 0.3 highly constrained (intolerant of deletion); 0.3-0.5 intermediate constraint; 0.5-1.0 moderate constraint; >1.0 no constraint [PMID: 32461654]
3	Sourced from OMIM & PubMed search
4	Sourced from PubMed search
5	Human haploinsufficiency data sourced from OMIM & PubMed search
6	Animal and or cell data sourced from OMIM & PubMed search
7	Sourced from GWAS Central and PubMed
8	Sourced from PubMed
ND	No data

## Sheet: 2. AI genes
Functional class	Selected gene [1]	Publication	Population AI Observed	AI source	Constraint [LOUEF] [2]	Description [3]	Molecular Function [4]	Human deletion phenotype [5]	Animal haploinsufficiency and/or homozygous deletion phenotype [6]	GWAS Association [7]	Key literature [8]
Neurological	CAPN11	Gittleman	EUR;SAS	Neandertal	1.151	protein; intracellular; cysteine protease; Calpain family [atypical]	Control protein function by limited proteolysis	nd**	ND	GWAS for neuropathic pain	[PMID:10559499]; [PMID:32432769]
Neurological	CDH10	Gittleman	EUR;SAS	Neandertal	0.419	protein; plasma membrane; Cadherin family;	neuronal circuit control [retinal]; cell adhesion; brain expressed	ND	ND		[PMID:30197236]; [PMID:16181616]
Neurological	CDH13	Setter	EUR	Unknown	0.594	protein; plasma membrane; Cadherin family [atypical]	cell adhesion; brain expressed	nd	mKO hippocampal neuron signal defect; defects in learning and memory; rKO response to pyschomotor (addiction) stimulants		[PMID:22765916]; PMID:26460479]; [PMID:28387990)
Neurological	CNTN5	Gittleman	EAS	Neandertal	0.485	protein; plasma membrane; Contactin family; immunoglobulin superfamily	neural adhesion molecule; iPS cells from ASD (autism spectrum) patients show dyregulated neuronal circuits and lack CNTN5	ND	ND		[PMID:30747104]
Neurological	GLB1	Gittleman	EAS	Neandertal	0.86	protein; intracellular; lysosome; enzyme; hydrolyse	cleaves b-galactosidase from substrates	GM1-gangliosidosis; nerve degeneration; neurodgeneration	Neuodegeneration in dogs		[PMID:1907800]; [PMID:1907800]; [PMID:3925555]; [PMID:3925555]
Neurological	GRM4	Setter	EUR	Unknown	0.285	protein; plasma membrane; metabotropic G-coupled membrane R family;	binds L-glutamate (neurotransmitter)	ND	mKO viable; impaired learning of complex motor tasks; impaired synaptic plasticity	GWAS depression; epilepsy	[PMID:8738157]; [PMID:8815915]; [PMID:27792966]; [PMID:24840839]
Neurological	GTF2IRD1	Setter	EUR	Unknown	0.329	protein; intracellular; homology to helix-loop-helix transcription factor TFII-I	transcription factor	William-Beuren Syndrome; craniofacial and cognitive development	mKO craniofacial defomities		[PMID:16293761]; [PMID:16293761]; [PMID:9676970]; [PMID:11073954]
Neurological	ITSN2	Setter	EUR	Unknown	0.491	protein; intersectin family; intracellular; adapter protein	plays a role in protein-protein interactions to mediate endocytosis/synaptic vesicle re-cycling	ND	mKO viable; no major neuro phenotype but sensitises to defects in bimanual coordination (learning and memory); drosKO abnormal neuronal architecture; c elegans KO abnormal synaptic activity		[PMID:10922467]; [PMID:23447614]; [PMID:23447614]; [PMID:15260956]; [PMID:18298590]
Neurological	KCNH5	Gower	MEL	Denisovan	0.442	protein; plasma membrane; K+ voltage gated channel	Maintain K+ gradient across membrane; decrease membrane potential; nervous system expressed	causal mutation in child with epilepsy	ND		[PMID:24133262]; [PMID:23647072]
Neurological	LYPD6B	Gittleman	EAS;EUR;SAS	Neandertal	1.126	protein; plasma membrane; Ly-6 protein family;	neuronal; mediates nicotinic AC h R signalling	severe intellectual disability with microduplication	ND		[PMID:26586467]; [PMID:22085900]
Neurological	RAB3C	Gower	EUR	Neandertal	1.174	potein; intracellular; RAS family; GTP binding proten;	regulates exocytosis in neurons; neuororansmitter release	ND	ND		[PMID:10488439]
Neurological	RPS6KA2	Gittleman	EAS	Neandertal	0.445	protein; intracellular; kinase; S6 ribosomal family	mediate MAPK signaling pathway	ND	ND	Mouse embryo expression data locates to developing neural tube, dorsal root ganglia and mature brain	[PMID:12393804]
Neurological	SESTD1	Gower	EUR	Neandertal	0.265	protein; intracellular; GTPase regulatory protein	role in neuronal synapse; component of planar cell polarity (PCP) pathway; PCP interacts with WNT	ND	neurodevelopmental and neuro functional defects; major embryo developmental defects		[PMID:29474518]; [PMID:23696638]
Neurological	SIPA1L2	Gittleman	EAS	Neandertal	0.287	protein; intracellular; Rap GTPase activating protein (apGAPs)	abundant in brain; regulates neurotransmitter release	ND	mKO impaired stimulus triggered presynaptic plasticity		[PMID:26364583]; [PMID:31784514]
Neurological	SLC6A1	Gittleman	EUR	Neandertal	0.15	protein; plasma membrane; solute carrier	GABA (neurotransmitter) transporter	Spontaneous seizures (epilepsy)	mKO spontaneous seizures with unconsciousness		[PMID 8412566]; [PMID:25865495]; [PMID:19966779]
Neurological	SMOX	Gittleman	EUR	Neandertal	0.467	protein; intracellular; enzyme	catalyzes polyamine catabolism (cell nutrient)	ND	mKO viable; develop spontaneous cerebellar damage and ataxia; Transgenic mice spontaneous epileptic seizures		[PMID:12141946]; [PMID:33054763]; [PMID:31197571]
Neurological	TMEM132D	Gittleman	EAS	Neandertal	0.232	protein; plasma membrance; Ig and cohesion domain containing protein	putative cellular adhesion[?]; oligodendrocyte expressed	ND	ND	GWAS panic disorder and anxiety	[PMID:12966072]; [PMID:22948381]; [PMID:20368705]; [PMID:29317594]
Neurological	WWOX	Gower	MEL	Denisovan	1.532	protein; intracellular; enzyme	oxidoreductase; regulates apoptosis & cell proliferation	autosomal recessive spinocerebellar ataxia-12; developmental and epileptic encephalopathy-28	mKO & rats; premature lethality; neurodegeneration; spontanous seizures [sound induced]; hets spontanous cancers		[PMID:17470496]; [PMID:24369382]; [PMID:25411445]; [PMID:32000863]
Neurological	ZNF385D	Gittleman	SAS	Neandertal	0.47	non coding RNA; intracellular	unknown	ND	ND	GWAS for reading disability an language impairment	[PMID:24024963]
Metabolism	ACO1	Gittleman	SAS	Neandertal	0.932	protein; intracellular; enzyme	iron response element; binds 3UTR and 5'-ferritin mRNA	ND	ND
Metabolism	AGL	Gittleman	MEL	Ambiguous	0.795	protein; intracellular; enzyme	glycogen degradation; cleaves glycogen branches	Glycogen storage disease; infantile hepatomegaly, myopathy x	ND		[PMID:28708136]; [PMID:8755644]
Metabolism	ALLC	Gittleman	MEL	Neanderthal	1.483	protein; intracellular; enzyme; allantoicase	allantoicase; uric acid metabolism; conserved to yeast; in mammals[vertebrates] enzyme inactive	ND	ND		[PMID:12036579]
Metabolism	BNC2	Gittleman/Gower	EUR	Neandertal	0.34	protein; intracellular; evolutionary conserevd zinc finger protein	putative transcription factor	human pigmentation	pigment/skin colour role: mice; early lethality [cranio facial abnorm]		[PMID:19706529]
Metabolism	GALNT13	Gittleman	EUR	Neandertal	0.285	protein; plasma membrane; enzyme; galactosaminyltransferase family	catalyses glycosylation of protein substrates	ND	ND		[PMID:20977886]
Metabolism	JAKMIP3	Gittleman	EUR	Neandertal	0.399	protein; intracellular; golgin family	expressed in adipocytes; regulates signaling through lipid rafts [caveola]; regulates insulin AKT activation	ND	ND		[PMID:30160359]
Metabolism	OCA2	Gittleman	EAS;SAS	Neandertal	0.856	protein; intracellular	melanocyte expressed; human "P" gene, organic molecule transporter	human eye colour variation	pink eye' phenotype in mice		[PMID:7874125]; [PMID:17236130]; [PMID:1495987]
Metabolism	PPARG*	Jacobs	MEL	Denisovan	0.635	protein; intracellular; PPAR nuclear receptor family protein	transcription factor; energy metablism; activate gene transcriptional response to metabolic triggers	severe insulin resistence; diabetes; lipodystrophy	embryonic lethal		[PMID:10622252]; [PMID:12453919]; [PMID:10549290]
Metabolism	SRFP4*	Gower	MEL	Denisovan		protein; secreted; frizzled related protein; sfrp family	soluble mediaters of WNT signalling	impaired glucose sensing and homeostasis; role in adipose tissue mass	mKO weight gain on high fat diet; redeuced energy expenditure; mTg decreased adipocyte size and metabolic programming		[PMID:23140642]; [PMID:25322919]; [PMID:26406932]; [PMID:32657640]
Metabolism	TSHR	Setter	EUR	Unknown	1.259	protein; plasma membrane	thyroid receptor for TSH	hyperthyroidism	runted; hypothyroid; premature lethality		[PMID:9385128]; [PMID:14567913]
Metabolism	WDFY2*	Jacobs	MEL	Denisovan	0.994	protein; intracellular	energy sensing pathway; protein; intracellular; signal transduction; hormone responsive; interacts wih INS R; binds AKT	ND	insulin resistnce; increased gluconogenesis; promotes adipogenesis		[PMID:16792529]; [PMID:32641353]; [PMID:18388859]
Metabolism	ZBTB20	Gower	EUR	Neandertal	0.317	protein; intracellular; zinc finger protein; POK famly	transcriptional repressor; DNA binding [zinc finger domain]	primrose syndrome [ossification of ears]	growth retardation and hypoglycemia , metabolic dysfunction		[PMID:21567911]; [PMID:19273596]
Development	7SK	Gittleman	EAS	Neandertal		non coding RNA; intracellular; small nuclear RNA	binds CDK9 and regulates transcription elongation [interacts with poll II]	ND	ND		[PMID:11713533]; [PMID:33046273]
Development	AB13BP	Gittleman	SAS	Neandertal		protein; intracellular; adapter protein	binds NESH (ABI family); possible role in cytoskeletal arrangement and cell migration	ND	ND
Development	ATP1B1	Gittleman	EUR	Neandertal	0.153	protein; plasma membrane; Na/K ATPase pump	maintain ionic homeostasis; play a role in diverse biologies [hence broad disease impact]	Severe neurological disease; link to Wolfram Syndrome [diabetes]	ND	GWAS for hypertension	[PMID:32301109 ]; [PubMed: 17947299]; [PMID:17236131]
Development	CBX6	Gittleman	SAS	Neandertal	0.262	protein; intracellular; Chromobox protein family	component of polycomb repressive complex (PRC1); binds methylated DNA, transcriptional regulator	ND	Highly expressed in ES cells; required for stem-cell'ness' (pluripotency)		[PMID:11242053]; [PMID:29089522]
Development	CDC73	Gittleman	EUR	Neandertal	0.188	protein; intracellular	cell cycle; component of PAF complex; regulates pol II subunit POLR2A; transcription control (elongation, initation); cell cycle	Hyperthyroidism-jaw tumor syndrome (HPT-JT)	Spontaneous hyperthyroid jaw tumors		[PMID:15632063]; [PMID:12434154]; [PMID:28288139]
Development	FAM46A	Gower	MEL	Denisovan	0.374	protein; intracellular; enzyme; nucleotidyltransferase family	catalyse transfer of nucleoside triphosphates; role in cell cycle	ND	mouse: fetal cardiomyocyte formation of heart; xenoKO embryonic abnoromalities [eye formation; body colour]		[PMID:28667270]; [PMID:30291163]
Development	FOXB2	Setter	EUR	Unknown	1.516	proten; intracellular; forkhead box transcription factor family;	transcriptional regulator conserved to unicellular organisms; foxb2 unknown; general developmental role; possibly controls neuroendocrine cell differentiation	ND	ND		[PMID:2733165]; [PMID:31611391]
Development	GJA3	Gittleman	EUR	Neandertal	1.488	protein; plasma membrane; connexin family;	gap junction protein; specific to occular lens; maintains lens transperancy	congenital cataracts	mKO viable, fertile, spontaneous cataracts		[PMID:15286166]; [PMID:10205266]; [PMID:9413992]
Development	KCNE4	Setter	EUR	Unknown	1.362	protein; plasma membrane; type 1 membrane protein; voltage gated K+ channel; KCNE family	negative regulator of K channel function; wide tissue distribution	ND	mKO regulates ischemic injury response		[PMID:19029186]; [PMID:30758982]
Development	MACROD2	Gittleman	EUR	Neandertal	0.434	protein; intracellular; enzyme; deacetylase	regulates APC/C dependent chrmosome stability, DNA repair/damage response	Kabuki Syn [congenetial mental retardation; skeletal abnomalites; facial dysmorphism]	mKO; controls PARP1 activity and DNA repair response		[PMID:29880585]; [PMID:17586838]; [PMID:29880585]
Development	MBD2	Gittleman	EAS;EUR	Neandertal	0.522	protein; intracellular; nuclear protein family [methyl-CpG binding domain]	binds methylated DNA, demethylase transcriptional activator	ND	mKO vable, fertile, regulates intestinal tumorigenesis; mice lack maternal behaviour!!!		[PMID:12730693]; [PMID:11274056]
Development	NEBL	Gittleman	EAS	Neandertal	1.139	protein; intracellular; related to avian nebulette protein	skeletal muscle expressed; binds actin; component of 'z disc' [striated muscle]	DSG2 syndrome with cardiac and craniofacial abnomaliies	mKO muscle defect [z line widening.increased cardiac stress markers		[PMID:9733644]; [PMID:12504851]; [PMID:25987543]
Development	PRKCH	Gower	MEL	Denisovan	0.388	protein; cytoplasm; enzyme; PKC family [PKCeta]	phospho lipid metabolic/signalling; role in signalling cascades mediated by 1,2, DAG	ND	ND	GWAS cerebral infarction in asians	[PMID:17206144]
Development	RAB27A*	Gower	MEL	Denisovan	1.653	protein; intracellular; RAS family;	GTP binding proten; regulate exocyosis; vesicle transport	Griscelli Syndrome; impaired melanophilin interactions and transport	'dilute' 'leaden' 'ashen' colour phenotype in mice		[PMID:10488439]; [PMID:12531900]; [PMID:10859366]
Development	RBM19	Gower	MEL	Denisovan	0.73	protein; intracellular	predicted RNA binding protein; ribosome biogenesis	ND	zfko; absence gut; liver; exo panc		[PMID:12874115]
Development	TFCP2L1	Setter	EUR	Unknown	0.143	protein; intracellular	transcription factor; plays a role in embryo development	ND	Controls ES differentiation state(pluripotency)		[PMID:11073954]; [PMID:30241344]; [PMID:28843285]
Development	TLK1	Setter	EUR	Unknown	0.165	protein; intracellular; enzyme; Tousled-like kinase family	DNA damage control (ATM path)	ND	mKO viable; deletion of TLK1 & 2 spontaneous genome instability (high freq DNA damage resulting in serious mutations)		[PMID:12660173]; [PMID:28708136]
Development	WRD88*	Gower/Gittleman	EUR	Neandertal		protein; intracellular	candidate cilia component; paralogue interacts with dynein motor components	ND	ND
Reproduction	CSMD1	Gower	MEL	Denisovan	0.211	protein; extracellular	enriched expression in gonads; regulates C' [complement]	ND	mKO male show gonadal and fertility defects; females show reduced ovarian quality and breeding success	GWAS gonadal dysfunction [azoospermia]	[PMID:31604923]; [PMID:23555275]; [PMID:31604923]
Immunity	ALX	Gower	EUR	Neandertal		protein; intracellular;	role in T cell activation [downstrem of TCR and CD28]	ND	ND		[PMID:11700021]
Immunity	C1orF168 [FYB2]	Gittleman	SAS	Neandertal		protein; intracellular; adapter protein	component of signalling network associated to TCR; triggered by TCR	ND	ND		[PMID:27335501]
Immunity	SLC46A2	Setter	EUR	Unknown	1.63	protein; plasma membrane; glycoprotein; solute carrier family	membrane transporter; thymus expressed [possible T cell function]; recognises bacterial toxins in drosophila	ND	drosKO impaired immune response to microbial pathogens		[PMID:10978518]; [PMID:28539433]
Immunity	TNFAIP3	Gower	MEL	Denisovan	0.196	protein; intracellular; enzyme; Zinc finger protein; TNFAIP3 family	Ubiquitin editing enzyme; regulation of inflammatory signalling [NF-kB]	highly penetrant inflammatory disease	mKO premature lethality; uncontrolled inflammation		[PMID:15258597]; [PMID:26642243]; [PMID:31534238]
Unknown	AKO55368	Gittleman	EUR	Neandertal		ND	ND	ND	ND
Unknown	CWF19L2	Gittleman	SAS	Neandertal	0.839	protein; cytoplasmic; unknown	ND	ND	ND
Unknown	KBTBD12	Setter	EUR	Unknown	1.233	ND	ND	ND	ND
Unknown	LIN00615	Gittleman	EUR;SAS	Neandertal		ND	ND	ND	ND
Unknown	LINC00470	Gittleman	EUR;SAS	Neandertal		ND	ND	ND	ND
Unknown	LOC286370	Gittleman	SAS	Neandertal		ND	ND	ND	ND
Unknown	SNORD81	Gittleman	EUR	Neandertal		non coding RNA; small nucleolar RNA C/D box family; snoRNA class	unknown; may mediate RNA processing, modifications	ND	ND		[PMID:22094949]
FOOTNOTES:
1	Single gene sweep; gene name from OMIM
2	Constraint definition based on LOUEF score whereby < 0.3 highly constrained (intolerant of deletion); 0.3-0.5 intermediate constraint; 0.5-1.0 moderate constraint; >1.0 no constraint [PMID: 32461654]
3	Sourced from OMIM & PubMed search
4	Sourced from PubMed search
5	Human haploinsufficiency data sourced from OMIM & PubMed search
6	Animal and or cell data sourced from OMIM & PubMed search
7	Sourced from GWAS Central and PubMed
8	Sourced from PubMed
ND	No data
*	AI edge cases

## Sheet: 3. AAH genes
Functional class	Selected gene [1]	Publication	Constraint [LOUEF] [2]
Neurological	CAMK2A	Cardano	0.251
Neurological	CNTN4	Cardano	0.519
Neurological	CNTNAP2	Cardano	0.547
Neurological	DISC1	Cardano	0.789
Neurological	DSCAM	Cardano	0.189
Neurological	GRM4	Cardano	0.285
Neurological	KCNH1	Reynolds	0.387
Neurological	LIPT2	Cardano	0.944
Neurological	NKAIN2	Cardano	0.768
Neurological	NRG1	Cardano	0.258
Neurological	NRXN1	Cardano	0.254
Neurological	PLXNA4	Cardano	0.229
Neurological	PPFIA2	Cardano	0.139
Neurological	SDK1	Cardano	0.398
Neurological	TMPRSS3	Cardano	1.119
Neurological	TRPM2	Cardano	1.112
Metabolism	FADS1	Fumagalli	0.445
Metabolism	FADS2	Fumagalli	0.232
Metabolism	FADS3	Fumagalli	0.622
Metabolism	HS3ST4	Reynolds	0.494
Metabolism	LAMA2	Cardano	0.732
Metabolism	MYL2	Fumagalli	1.751
Metabolism	OCA2	Reynolds	0.856
Metabolism	SLC38A4	Cardano	0.413
Development	ALK	Cardano	0.448
Development	CCDC63	Fumagalli	1.294
Development	CORIN	Cardano	1.232
Development	DNMT3L	Cardano	1.297
Development	DSP	Fumagalli	0.26
Development	EDAR	Zhou	0.906
Development	GML	Zhou	1.47
Development	GPC6	Cardano	0.511
Development	MEIS2	Cardano	0.184
Development	NSMCE1	Zhou	1.178
Development	SDCCAG8	Cardano	0.784
Development	SLC24A5	Zhou	1.163
Development	SREBF2	Zhou	0.382
Development	TBX15	Fumagalli	0.437
Development	TCOF1	Cardano	0.311
Immunity	AIM2	Zhou	1.006
Immunity	AIRE	Cardano	1.115
Immunity	CD74	Cardano	0.564
Immunity	CYPIIB1	Fumagalli/Zhou
Immunity	ICOSLG	Cardano	0.919
Immunity	ITGB8	Cardano	0.264
Immunity	MKL1	Cardano	0.259
Immunity	NCR1	Zhou	1.454
Immunity	STAT2	Zhou	0.319
Immunity	ZXDC	Zhou	1.005
Unknown	ANGPTL6	Fumagalli	1.193
Unknown	ARSI	Cardano	1.414
Unknown	ATP10D	Zhou	0.787
Unknown	C1orf227	Zhou	1.543
Unknown	C21orf2	Cardano	1.396
Unknown	CHERP	Fumagalli	0.062
Unknown	FN3K	Fumagalli	1.363
Unknown	FOXN3	Cardano	0.363
Unknown	GALNTL1	Cardano
Unknown	GML	Zhou	1.465
Unknown	LONP2	Cardano	1.349
Unknown	MX2	Cardano	0.798
Unknown	PCNP	Cardano	0.502
Unknown	PFKL	Cardano	1.035
Unknown	PGK2	Zhou	1.608
Unknown	PLD5	Cardano	0.523
Unknown	POLD3	Cardano	0.236
Unknown	PSCA	Zhou	1.663
Unknown	PSD3	Cardano	0.445
Unknown	SGSM3	Cardano/Fumagalli	0.902
Unknown	SLC35F3	Fumagalli	0.535
Unknown	SLC6A7	Cardano	0.884
Unknown	SNX21	Fumagalli	1.447
Unknown	SORCS2	Cardano	0.428
Unknown	TSPAN13	Cardano	1.106
Unknown	WARS2	Fumagalli	0.666
Unknown	ZNF283	Zhou	1.122
Unknown	ZNF518B	Fumagalli	0.577
FOOTNOTES:
1	Single gene sweep; gene name from OMIM
2	Constraint definition based on LOUEF score whereby < 0.3 highly constrained (intolerant of deletion); 0.3-0.5 intermediate constraint; 0.5-1.0 moderate constraint; >1.0 no constraint [PMID: 32461654]

## Sheet: 4. Summary
Function	Category	N	Total	Proportion [Unknown removed]
Neurological	AAH	16	49	0.326531
Neurological	AI	19	54	0.351852
Neurological	Driver	10	32	0.3125
Development	AAH	15	49	0.306122
Development	AI	18	54	0.333333
Development	Driver	10	32	0.3125
Metabolism	AAH	8	49	0.163265
Metabolism	AI	12	54	0.222222
Metabolism	Driver	9	32	0.28125
Reproduction	AAH	0	49	0
Reproduction	AI	1	54	0.0185185
Reproduction	Driver	2	32	0.0625
Angiogenisis	AAH	0	49	0
Angiogenisis	AI	0	54	0
Angiogenisis	Driver	1	32	0.03125
Immunity	AAH	10	49	0.204082
Immunity	AI	4	54	0.0740741
Immunity	Driver	0	32	0
