# Supplementary material for: Genetic and climatic factors in the dispersal of Anatomically Modern Humans Out of Africa
Source: Research Square preprint supplement (doi:10.21203/rs.3.rs-800178/v1), 2021-08-24
Supplement: Supplementary file 2 [file 2709204b91ff66ee70c71392.xlsx]

## Sheet: SI_Table 2
Chr	Sw.Start	Sw.End	SweepID	Sweep_label	Functional_criterion	Sweep_time_consensus	Population_Q<0.10	Selection_evidence_Eurasia	AllGenes
1	204586298	204991950	1:204.6-205	NFASC	iSAFE	Arabian_Standstill	WHG+EHG+An.+EF+LF+St.+LNBA	R	LRRN2;NFASC
2	84650647	85134132	2:84.7-85.1	DNAH6	iSAFE	Arabian_Standstill	WHG+An.+EF+LF+LNBA		SUCLG1;DNAH6;TRABD2A;TMSB10
2	158114110	158345473	2:158.1-158.3	GALNT5	iSAFE	Arabian_Standstill	EF+LF+St.+LNBA		GALNT5;ERMN;CYTIP
2	196602427	197041227	2:196.6-197	DNAH7	iSAFE	Aurignacian	WHG+EHG		DNAH7;STK17B
2	237476430	238751451	2:237.5-238.8	MLPH	iSAFE	Arabian_Standstill	WHG+An.+EF+LF+LNBA	P,S	ACKR3;COPS8;COL6A3;MLPH;PRLH;RAB17;LRRFIP1;RBM44
3	50400233	52188706	3:50.4-52.2	DOCK3	iSAFE	Initial_Upper_Paleolithic	An.+EF+LF+St.+LNBA	R,S	CACNA2D2;C3orf18;HEMK1;CISH;MAPKAPK3;MIR4787;DOCK3;MANF;RBM15B;RAD54L2;TEX264;GRM2;IQCF6;IQCF3;IQCF2;IQCF5;IQCF1;RRP9;PARP3;GPR62;PCBP4;ABHD14B;ABHD14A;ACY1;RPL29;DUSP7;POC1A
3	128628709	129612419	3:128.6-129.6	TMCC1	iSAFE	Arabian_Standstill	WHG+EHG+EF+LF+St.+LNBA	S	KIAA1257;EFCC1;GP9;RAB43;ISY1-RAB43;ISY1;CNBP;COPG1;HMCES;H1FX;SNORA7B;EFCAB12;MBD4;IFT122;RHO;H1FOO;PLXND1;TMCC1
4	78078304	78532988	4:78.1-78.5	CCNG2	iSAFE	Arabian_Standstill	WHG+LF		CCNG2;CXCL13
5	109624934	110100857	5:109.6-110.1	TMEM232	iSAFE	Arabian_Standstill	EF+LF+St.+LNBA	P	TMEM232;MIR548F3;SLC25A46
5	144851362	145891524	5:144.9-145.9	PRELID2	iSAFE	Arabian_Standstill	EF+LF+St.+LNBA	P,S	PRELID2;GRXCR2;SH3RF2;PLAC8L1;LARS;RBM27;POU4F3;TCERG1
6	12717893	13487894	6:12.7-13.5	TBC1D7	iSAFE	Aurignacian	WHG+LF	S	PHACTR1;TBC1D7;GFOD1
6	34433916	35464853	6:34.4-35.5	PPARD	iSAFE	Eastern_or_Basal_Eurasian	WHG+EHG+EF+St.+LNBA	P	PACSIN1;SPDEF;C6orf106;SNRPC;UHRF1BP1;TAF11;ANKS1A;TCP11;SCUBE3;ZNF76;DEF6;PPARD;FANCE;RPL10A;TEAD3
7	36893961	37488852	7:36.9-37.5	ELMO1	iSAFE	Aurignacian	WHG+EHG+LNBA	P,S	ELMO1;MIR1200
8	67341263	68255912	8:67.3-68.3	ARFGEF1	iSAFE	Arabian_Standstill	WHG+LNBA		RRS1;ADHFE1;MYBL1;VCPIP1;C8orf44-SGK3;C8orf44;SGK3;MCMDC2;SNHG6;TCF24;PPP1R42;COPS5;CSPP1;ARFGEF1
11	45670427	46940193	11:45.7-46.9	AMBRA1	iSAFE	Arabian_Standstill	An.		CHST1;SLC35C1;CRY2;MAPK8IP1;C11orf94;PEX16;PHF21A;CREB3L1;DGKZ;MIR4688;MDK;CHRM4;AMBRA1;MIR3160-1;MIR3160-2;HARBI1;ATG13;ARHGAP1;ZNF408;F2;CKAP5;MIR5582;SNORD67;LRP4
12	27485787	27848497	12:27.5-27.8	SMCO2	iSAFE	Gravettian	An.+LNBA		ARNTL2;SMCO2;PPFIBP1
13	29598748	30169825	13:29.6-30.2	SLC7A1	iSAFE	Eastern_or_Basal_Eurasian	An.+EF+LF+St.+LNBA		MTUS2;SLC7A1
15	48413169	48938046	15:48.4-48.9	FBN1	iSAFE	Eastern_or_Basal_Eurasian	EF+St.+LNBA	P,S	SLC24A5;MYEF2;CTXN2;SLC12A1;DUT;FBN1
17	34071530	34329100	17:34.1-34.3	TAF15	iSAFE	Arabian_Standstill	EHG+An.+EF+LF+St.+LNBA		GAS2L2;MMP28;C17orf50;TAF15;CCL5;RDM1;LYZL6;CCL16;CCL14;CCL15
17	58039724	59470199	17:58-59.5	BCAS3	iSAFE	Arabian_Standstill	EF+LF+St.+LNBA	P,R	TBC1D3P1-DHX40P1;MIR4737;HEATR6;CA4;USP32;SCARNA20;C17orf64;APPBP2;PPM1D;BCAS3
18	71740588	72026422	18:71.7-72	FBXO15	iSAFE	Magdalenian	An.+EF+LF+St.		FBXO15;TIMM21;CYB5A;C18orf63
22	46546424	46933067	22:46.5-46.9	GTSE1	iSAFE	Arabian_Standstill	EHG+LF+St.+LNBA	P,R	PPARA;CDPF1;PKDREJ;TTC38;GTSE1;TRMU;CELSR1
1	170904612	171255117	1:170.9-171.3	FMO2	iSAFE.edge	Arabian_Standstill	WHG+An.+LF		MROH9;FMO3;MIR1295A;FMO2;FMO1
2	109335937	109605828	2:109.3-109.6	CCDC138	iSAFE.edge	Eastern_or_Basal_Eurasian	An.+EF+LF+LNBA	P,R	RANBP2;CCDC138;EDAR
3	9834766	10982419	3:9.8-11	FANCD2	iSAFE.edge	Aurignacian	WHG+EHG+An.+EF+LF		ARPC4-TTLL3;TTLL3;RPUSD3;CIDEC;JAGN1;IL17RE;IL17RC;CRELD1;PRRT3;EMC3;FANCD2;FANCD2OS;BRK1;VHL;IRAK2;TATDN2;GHRL;SEC13;ATP2B2;MIR378B;MIR885;LINC00606;SLC6A11
5	74364100	75013313	5:74.4-75	COL4A3BP	iSAFE.edge	Arabian_Standstill	An.+EF+LF	P	ANKRD31;HMGCR;COL4A3BP;POLK;ANKDD1B;POC5
10	118083940	118368687	10:118.1-118.4	PNLIPRP3	iSAFE.edge	Arabian_Standstill	An.+EF+LF+St.+LNBA	P,S	CCDC172;PNLIPRP3;PNLIP;PNLIPRP1
15	43699407	44487450	15:43.7-44.5	TP53BP1	iSAFE.edge	Arabian_Standstill	St.+LNBA	R	TP53BP1;MAP1A;PPIP5K1;CKMT1B;STRC;CATSPER2;CKMT1A;PDIA3;ELL3;SERF2;MIR1282;SERINC4;HYPK;MFAP1;WDR76;FRMD5
7	24612887	24733812	7:24.6-24.7	MPP6	Single	Arabian_Standstill	An.+EF+LF	S	MPP6
10	122938214	122945480	10:122.9-123	LINC01153	Single	NA	EHG+An.+EF+LF+St.+LNBA		LINC01153
12	67663061	67713731	12:67.7-67.8	CAND1	Single	Arabian_Standstill	An.		CAND1
16	78133310	79246564	16:78.1-79.2	WWOX	Single	Initial_Upper_Paleolithic	An.+EF+LF	P,S	WWOX
20	53092136	53267710	20:53.1-53.3	DOK5	Single	Arabian_Standstill	St.+LNBA	P,S	DOK5
1	35449523	36538101	1:35.4-36.5	ZMYM6		Initial_Upper_Paleolithic	WHG+EHG+An.+EF+LF+St.+LNBA	P,R	ZMYM6;ZMYM1;SFPQ;ZMYM4;KIAA0319L;NCDN;TFAP2E;PSMB2;C1orf216;CLSPN;AGO4;AGO1;AGO3
3	15422782	15687329	3:15.4-15.7	METTL6		Initial_Upper_Paleolithic	WHG+EHG		METTL6;EAF1;COLQ;MIR4270;HACL1;BTD
3	140660672	140867453	3:140.7-140.9	SLC25A36		Arabian_Standstill	St.+LNBA		SLC25A36;SPSB4
4	71494461	72437804	4:71.5-72.4	ENAM		Aurignacian	An.+EF+LF+St.+LNBA		ENAM;UTP3;RUFY3;GRSF1;MOB1B;DCK;SLC4A4
6	27775257	28502729	6:27.8-28.5	HIST1H2BL		Arabian_Standstill	An.+EF+LF+LNBA		HIST1H2BL;HIST1H2AI;HIST1H3H;HIST1H2AJ;HIST1H2BM;HIST1H4J;HIST1H4K;HIST1H2AK;HIST1H2BN;HIST1H2AL;HIST1H1B;HIST1H3I;HIST1H4L;HIST1H3J;HIST1H2AM;HIST1H2BO;OR2B2;OR2B6;ZNF165;ZSCAN16;ZKSCAN8;ZSCAN9;ZKSCAN4;NKAPL;PGBD1;ZSCAN31;ZKSCAN3;ZSCAN12;ZSCAN23;GPX6;GPX5
6	29523406	32806557	6:29.5-32.8	GABBR1		Eastern_or_Basal_Eurasian	EHG+An.+EF+LF+St.+LNBA	S	GABBR1;SNORD32B;OR2H2;MOG;ZFP57;HLA-F;HLA-G;HLA-A;HCG9;ZNRD1;PPP1R11;RNF39;TRIM31;TRIM40;TRIM10;TRIM15;TRIM26;HCG17;TRIM39;TRIM39-RPP21;RPP21;HLA-E;GNL1;PRR3;ABCF1;MIR877;PPP1R10;MRPS18B;ATAT1;C6orf136;DHX16;PPP1R18;NRM;MDC1;TUBB;FLOT1;IER3;DDR1;MIR4640;GTF2H4;VARS2;SFTA2;MUC21;MUC22;HCG22;C6orf15;PSORS1C1;CDSN;PSORS1C2;CCHCR1;TCF19;POU5F1;HCG27;HLA-C;HLA-B;MICA;LINC01149;MICB;MCCD1;DDX39B;SNORD1…
6	105404923	105627870	6:105.4-105.6	LIN28B		Arabian_Standstill	An.+LNBA	P,S	LIN28B;BVES;POPDC3
7	97920963	99332819	7:97.9-99.3	BAIAP2L1		Aurignacian	WHG+EHG+An.+EF+LF+St.+LNBA	R	BAIAP2L1;NPTX2;TMEM130;TRRAP;MIR3609;SMURF1;KPNA7;ARPC1A;ARPC1B;PDAP1;BUD31;PTCD1;CPSF4;ZNF789;ZNF394;ZKSCAN5;FAM200A;ZNF655;ZSCAN25;CYP3A5;CYP3A7
7	142552792	142836839	7:142.6-142.8	EPHB6		Arabian_Standstill	EF+LF+St.+LNBA		EPHB6;TRPV6;TRPV5;KEL;OR9A2;OR6V1;PIP
8	42552519	43057998	8:42.6-43.1	CHRNB3		Arabian_Standstill	WHG+An.+EF+LF+St.+LNBA	R	CHRNB3;CHRNA6;THAP1;RNF170;MIR4469;HOOK3;FNTA;POMK;HGSNAT
8	47733859	49647870	8:47.7-49.6	LINC00293		Initial_Upper_Paleolithic	WHG+EHG+St.+LNBA	R,S	LINC00293;SPIDR;CEBPD;PRKDC;MCM4;UBE2V2;EFCAB1
9	101493611	101992897	9:101.5-102	ANKS6		Aurignacian	WHG+An.+EF+LF+LNBA	S	ANKS6;GALNT12;COL15A1;TGFBR1;ALG2;SEC61B
10	22604903	23003484	10:22.6-23	COMMD3		Arabian_Standstill	An.+LF	P,R	COMMD3;COMMD3-BMI1;BMI1;SPAG6;PIP4K2A
10	32735068	33294720	10:32.7-33.3	CCDC7		Initial_Upper_Paleolithic	WHG+EHG+St.		CCDC7;ITGB1
10	74653339	75682535	10:74.7-75.7	OIT3		Aurignacian	WHG+An.+EF+LF+St.+LNBA	R	OIT3;PLA2G12B;P4HA1;NUDT13;ECD;FAM149B1;DNAJC9;MRPS16;ANXA7;MSS51;PPP3CB;USP54;MYOZ1;SYNPO2L;AGAP5;SEC24C;FUT11;CHCHD1;ZSWIM8;NDST2;CAMK2G;PLAU;C10orf55
12	57869228	58240522	12:57.9-58.2	MARS		Aurignacian	An.		MARS;DDIT3;MIR616;MBD6;DCTN2;KIF5A;PIP4K2C;DTX3;ARHGEF25;SLC26A10;B4GALNT1;OS9;AGAP2;TSPAN31;CDK4;MARCH9;CYP27B1;METTL1;TSFM;AVIL;CTDSP2;MIR26A2
12	109886461	113910085	12:109.9-113.9	KCTD10		Arabian_Standstill	WHG+EHG+An.+EF+LF+LNBA	P,R,S	KCTD10;UBE3B;MMAB;MVK;FAM222A;TRPV4;MIR4497;GLTP;TCHP;GIT2;ANKRD13A;C12orf76;IFT81;ATP2A2;ANAPC7;ARPC3;GPN3;FAM216A;VPS29;RAD9B;PPTC7;TCTN1;HVCN1;PPP1CC;CCDC63;MYL2;CUX2;SH2B3;ATXN2;BRAP;ACAD10;ALDH2;MAPKAPK5-AS1;MAPKAPK5;TMEM116;ERP29;NAA25;MIR3657;TRAFD1;HECTD4;RPL6;PTPN11;RPH3A;MIR1302-1;OAS1;OAS3;OAS2;DTX1;RASAL1;DDX54;RITA1;IQCD;TPCN1;SLC8B1;PLBD2;SDS;SDSL;LHX5
13	48807294	49283498	13:48.8-49.3	ITM2B		Arabian_Standstill	An.+EF	R,S	ITM2B;RB1;LPAR6;RCBTB2;LINC00462;CYSLTR2
15	42450899	43513481	15:42.5-43.5	VPS39		Arabian_Standstill	WHG+An.+EF+LF	R	VPS39;MIR627;TMEM87A;GANC;CAPN3;ZNF106;SNAP23;LRRC57;HAUS2;STARD9;CDAN1;TTBK2;UBR1;EPB42;TMEM62;CCNDBP1
16	820183	1968441	16:0.8-2	MIR662		Eastern_or_Basal_Eurasian	EHG+An.+EF+LF+St.+LNBA	P,S	MIR662;RPUSD1;CHTF18;GNG13;PRR25;LMF1;SOX8;SSTR5-AS1;SSTR5;C1QTNF8;CACNA1H;TPSG1;TPSB2;TPSAB1;TPSD1;UBE2I;BAIAP3;TSR3;GNPTG;UNKL;C16orf91;CCDC154;CLCN7;PTX4;TELO2;IFT140;TMEM204;MAPK8IP3;MIR3177;NME3;MRPS34;EME2;SPSB3;NUBP2;IGFALS;HAGH;FAHD1;MEIOB;HS3ST6
16	66461200	67963581	16:66.5-68	BEAN1		Arabian_Standstill	WHG+An.+EF+LF+St.+LNBA	S	BEAN1;TK2;CKLF;CKLF-CMTM1;CMTM1;CMTM2;CMTM3;CMTM4;DYNC1LI2;NAE1;CA7;PDP2;CDH16;RRAD;CES2;CES3;CES4A;CBFB;C16orf70;B3GNT9;TRADD;FBXL8;HSF4;NOL3;KIAA0895L;EXOC3L1;E2F4;ELMO3;MIR328;LRRC29;TMEM208;FHOD1;SLC9A5;PLEKHG4;KCTD19;LRRC36;TPPP3;ZDHHC1;HSD11B2;ATP6V0D1;AGRP;CTCF;ACD;PARD6A;ENKD1;C16orf86;GFOD2;RANBP10;TSNAXIP1;CENPT;THAP11;NUTF2;EDC4;NRN1L;PSKH1
16	72042487	72210777	16:72-72.2	DHODH		Initial_Upper_Paleolithic	WHG+EHG		DHODH;TXNL4B;HP;HPR;DHX38;PMFBP1
17	53796988	53920191	17:53.8-53.9	TMEM100		Arabian_Standstill	An.+LF+St.+LNBA	P	TMEM100;PCTP
20	21686297	22566093	20:21.7-22.6	PAX1		Initial_Upper_Paleolithic	LF+St.+LNBA		PAX1;LINC00261;FOXA2
