# Supplementary material for: Genetic and climatic factors in the dispersal of Anatomically Modern Humans Out of Africa
Source: Research Square preprint supplement (doi:10.21203/rs.3.rs-800178/v1), 2021-08-24
Supplement: Supplementary file 3 [file 41b37b341aafb84da66f8dc3.xlsx]

## Sheet: AADR_v42.4_samples_used
Instance ID	Short ID	Sex	Average of 95.4% date range in calBP (defined as 1950 CE)	Group_ID	Locality	Country	Lat.	Long.	Publication	Data type	Coverage on autosomal targets	SNPs hit on autosomal targets
A460.SG	A460	M	4660	Chile_WesternArchipelago_Ayayema_4700BP.SG	Ayayema Cave, Patagonia	Chile	-50.1	-75.24	MorenoMayarScience2018	Shotgun	10.32	1181323
Aconcagua.SG	Aconcagua	M	500	Argentina_Aconcagua_Inca_500BP.SG	Cerro Aconcagua, Mendoza Province	Argentina	-32.65	-70.01	MorenoMayarScience2018	Shotgun	2.52	1027717
AHUR_2064.SG	AHUR_2064	M	10970	USA_Nevada_SpiritCave_11000BP.SG	Nevada, Spirit Cave	USA	37.41	-122.08	MorenoMayarScience2018	Shotgun	17.94	1181994
Ajvide58.SG	Ajvide58	M	4700	Sweden_PWC_NHG.SG	Gotland, Stora Karlso	Sweden	57.5	18.55	SkoglundScience2014	Shotgun	2.31	1043030
Alh1.SG	Alh1	M	1500	Germany_EMedieval.SG	Bavaria, Altheim	Germany	..	..	VeeramahPNAS2018	Shotgun	0.85	1116070
Alh10.SG	Alh10	M	1489	Germany_EMedieval.SG	Bavaria, Altheim	Germany	..	..	VeeramahPNAS2018	Shotgun	0.86	1100414
Altai_published.DG	Altai	F	51950	Altai_Neanderthal_published.DG	Denisova Cave, Altai	Russia	51.3975	84.6761	PrueferNature2013	Shotgun.diploid	52	1149663
Andaman.SG	Andaman	M	90	Indian_GreatAndaman_100BP.SG	Great Andaman Island	India	12.5	92.8	MorenoMayarScience2018	Shotgun	18.18	1163016
ans017.SG	ans017	M	5080	Sweden_Megalithic.SG	Ansarve	Sweden	57.3385	18.2563	SanchezQuintoPNAS2019	Shotgun	2.96	1109883
Anzick_realigned.SG	Anzick	M	12649	USA_Anzick_realigned.SG	Montana, Anzick Ranch	USA	45.9931	-110.661	RasmussenNature2014	Shotgun	14.05	1169065
atp002.SG	atp002	M	4740	Iberia_C.SG	Atapuerca, El PortaloÃÅn	Spain	..	..	ValdioseraPNAS2018	Shotgun	6.87	1175853
atp016.SG	atp016	F	5040	Iberia_C.SG	Atapuerca, El PortaloÃÅn	Spain	..	..	ValdioseraPNAS2018	Shotgun	11.31	1150106
atp12-1420.SG	atp12-1420	M	4896	Iberia_C.SG	Atapuerca, El PortaloÃÅn	Spain	..	..	ValdioseraPNAS2018	Shotgun	2.23	1044624
baa001.SG	baa001	M	1909	South_Africa_2000BP.SG	Ballito Bay A	South Africa	..	..	SchlebuschScience2017	Shotgun	12.93	1181491
bally.SG	bally	F	5132	Ireland_MN.SG	Ballynahatty, County Down	Ireland	54.5422	-5.95667	CassidyPNAS2016	Shotgun	11.29	1150887
Bar31.SG	Bar31	M	8279	Anatolia_N.SG	Northwest Anatolia, Marmara, Barcƒ±n	Turkey	40.3037	29.6085	HofmanovaPNAS2016	Shotgun	3.3	1087822
Bar8.SG	Bar8	F	8071	Anatolia_N.SG	Northwest Anatolia, Marmara, Barcƒ±n	Turkey	40.3037	29.6085	HofmanovaPNAS2016	Shotgun	6.93	1141733
Bichon.SG	Bichon	M	13665	Switzerland_Bichon.SG	Grotte du Bichon	Switzerland	47.1	6.87	JonesNatureCommunications2015	Shotgun	8.44	1176132
Bon002.SG	Bon002	F	10078	Anatolia_Boncuklu_N.SG	Boncuklu	Turkey	37.7519	32.8649	KilincCurrentBiology2016	WISP+Shotgun	3.95	1077088
BOT14.SG	BOT14	M	5264	Kazakhstan_Eneolithic_Botai.SG	Botai	Kazakhstan	53.1667	67.6667	DamgaardScience2018	Shotgun	2.97	1114698
BOT15.SG	BOT15	M	5135	Kazakhstan_Botai.SG	Botai	Kazakhstan	53.1667	67.6667	DamgaardScience2018	Shotgun	2.41	1065924
BOT2016.SG	BOT2016	F	5450	Kazakhstan_Eneolithic_Botai.SG	Botai	Kazakhstan	53.1667	67.6667	DamgaardScience2018	Shotgun	13.6	1149684
BR2.SG	BR2	M	3140	Hungary_LBA.SG	Ludas-Varju-Dulo	Hungary	47.82	19.95	GambaNatureCommunications2014	Shotgun	19.16	1182644
C1.SG	C1	M	2775	Nepal_Chokhopani_2700BP.SG	Chokhopani Tomb, Nepal	Nepal	..	..	JeongPNAS2016	Shotgun	7.18	1178495
Chan.SG	Chan	F	9131	Iberia_HG.SG	Chan do Lindeiro	Spain	..	..	GonzalesFortesCurrentBiology2017	Shotgun	5.74	1036284
CovaMoura9B.SG	CovaMoura9B	F	4900	Iberia_LN_C.SG	Cova da Moura	Portugal	38.745	-9.21522	MartinianoPLoSGenetics2017	Shotgun	2.71	1069564
CR-01.SG	CR-01	F	1052	Island_Chumash_SanCruz.SG	San Cruz Island, CA	USA	34.0036	-119.726	ScheibScience2018	Shotgun	2.95	1079438
CT-01.SG	CT-01	M	414	LSCI.SG	San Catalina Island, CA	USA	33.3833	-118.417	ScheibScience2018	Shotgun	2.81	1085390
DA101.SG	DA101	M	1716	Kyrgyzstan_TianShanHun.SG	Tian Shan, Central Steppe	Kyrgyzstan	42.1594	77.4064	DamgaardNature2018	Shotgun	3.42	1087056
DA221.SG	DA221	M	2619	Kazakhstan_Nomad_IA.SG	Tian Shan, Central Steppe	Kazakhstan	43.1822	76.4131	DamgaardNature2018	Shotgun	2.98	1052809
DA222.SG	DA222	M	1100	Kazakhstan_Karluk.SG	Tian Shan, Central Steppe	Kazakhstan	43.0686	68.2489	DamgaardNature2018	Shotgun	3.4	1091284
DA223.SG	DA223	M	2273	Kazakhstan_Wusun.SG	Tian Shan, Central Steppe	Kazakhstan	43.0686	68.2489	DamgaardNature2018	Shotgun	2.76	1017734
DA228.SG	DA228	M	1350	Kazakhstan_Turk.SG	Tian Shan, Central Steppe	Kazakhstan	43.0686	68.2489	DamgaardNature2018	Shotgun	2.64	1027340
DA243.SG	DA243	M	1050	Russia_Alan.SG	Caucasus	Russia	43.9586	42.5873	DamgaardNature2018	Shotgun	3.11	1052525
DA246.SG	DA246	F	7727	Russia_Shamanka_Eneolithic.SG	Shamanka II	Russia	51.6983	103.703	DamgaardScience2018	Shotgun	2.9	1020382
DA249.SG	DA249	F	7840	Russia_Shamanka_Eneolithic.SG	Shamanka II	Russia	51.6983	103.703	DamgaardScience2018	Shotgun	4.5	1113894
DA28.SG	DA28	M	550	Kazakhstan_GoldenHordeAsian.SG	Tian Shan, Central Steppe	Kazakhstan	43.0686	68.2489	DamgaardNature2018	Shotgun	3.96	1101674
DA45.SG	DA45	M	2062	Mongolia_XiongNu.SG	Siberia, Tungus & Eastern Steppe	Mongolia	42.5258	105.18	DamgaardNature2018	Shotgun	8.67	1175282
Denisova_published.DG	Denisova	F	51950	Denisova_published.DG	Denisova Cave, Altai	Russia	51.3975	84.6761	MeyerScience2012	Shotgun.diploid	31	1149356
Denisova11.SG	Denisova11	F	90000	DenisovaNeanderthalMix.SG	Denisova Cave, Altai	Russia	51.3975	84.6761	SlonNature2018	Shotgun	1.97	979651
EBA1.SG	EBA1	F	4112	Kazakhstan_CentralSteppe_EMBA.SG	Gregorievka 2	Kazakhstan	51.6313	74.6645	DamgaardScience2018	Shotgun	3.22	1093798
EBA2.SG	EBA2	F	4494	Kazakhstan_CentralSteppe_EMBA.SG	Sjolpan 4	Kazakhstan	52.6298	76.7276	DamgaardScience2018	Shotgun	7.14	1147898
ela001.SG	ela001	F	493	South_Africa_400BP.SG	Eland Cave	South Africa	..	..	SchlebuschScience2017	Shotgun	10.53	1150235
ElMiron_d	ElMiron	F	18720	Iberia_ElMiron	El Miron	Spain	43.26	-3.45	FuNature2016	1240K	1.01	627275
F38.SG	F38	M	2852	Iran_IA_Hasanlu.SG	Hasanlu	Iran	37.005	45.459	BroushakiScience2016	Shotgun	2.04	1006536
FN2.SG	FN2	M	1650	Germany_LRoman.SG	Bavaria, Munich, Freiham-Nord cemetery	Germany	..	..	VeeramahPNAS2018	Shotgun	0.85	1094129
GB.SG	GB	F	5378	Romania_C.SG	Gura Baciului	Romania	..	..	GonzalesFortesCurrentBiology2017	Shotgun	3.84	1116974
Goyet_final_provisional.SG	Goyet_final_provisional	F	42540	Goyet_Neanderthal.SG	Goyet Cave	Belgium	50.446	5.008	HajdinjakNature2018	Shotgun	1.49	887911
GoyetQ116-1_published	GoyetQ116-1	M	34795	Belgium_UP_GoyetQ116_1_published_all	Troisieme caverne of Goyet cave	Belgium	50.446	5.008	FuNature2016	1240K	1.05	780462
gun011.SG	gun011	M	1159	Canary_Islands_Guanche.SG	Tenerife	Canary Islands	28.2686	-16.6056	RodriguezVarelaCurrentBiology2017	Shotgun	4.14	1156055
Gyvakarai1_10bp	Gyvakarai1_10bp	M	4495	Lithuania_LN	Gyvakarai	Lithuania	..	..	MittnikNatureCommunications2018	1240K	4.48	1137323
HSJ-A-1_38.SG	HSJ-A-1_38	M	1015	Iceland_Pre_Christian.SG	Hrolfsstadir	Iceland	..	..	EbenesersdottirScience2018	Shotgun	5.28	1164678
Hum2.SG	Hum2	M	9364	Norway_Mesolithic.SG	Hummervikholmen	Norway	..	..	GuntherPLoSBiology2018	Shotgun	4.22	1115169
I0017.SG	I0017	M	7626	Sweden_HG_Motala.SG	Motala, Kanaljorden	Sweden	58.535	15.046	LazaridisNature2014	Shotgun	2.2	1046565
I0061	I0061	M	8280	Russia_HG_Karelia	Karelia, Yuzhnyy Oleni Ostrov	Russia	61.65	35.65	MathiesonNature2015 (1240k of same same sample with 390k in HaakLazaridis2015)	1240K	5.27	1025148
I0103	I0103	F	4473	Germany_CordedWare	Esperstedt	Germany	51.42	11.68	MathiesonNature2015 (1240k of same same sample with 390k in HaakLazaridis2015)	1240K	17.53	1049840
I0118	I0118	F	4309	Germany_LN_Alberstedt	Alberstedt	Germany	51.45	11.63	MathiesonNature2015 (1240k of same same sample with 390k in HaakLazaridis2015)	1240K	11.37	1048626
I0157.SG	I0157	F	1232	England_Saxon.SG	England, East Anglia, Hinxton	Great Britain	52.08	0.18	SchiffelsNatureCommunications2016	Shotgun	3.92	1075331
I0159.SG	I0159	F	1247	England_Saxon.SG	England, East Anglia, Hinxton	Great Britain	52.08	0.18	SchiffelsNatureCommunications2016	Shotgun	2.89	1053950
I0160.SG	I0160	M	1995	England_LIA.SG	England, East Anglia, Hinxton	Great Britain	52.08	0.18	SchiffelsNatureCommunications2016	Shotgun	8.44	1172478
I0172	I0172	M	5173	Germany_MN_Esperstedt	Esperstedt	Germany	51.42	11.68	MathiesonNature2015 (1240k of same same sample with 390k in HaakLazaridis2015)	1240K	25.37	1035229
I0231_published	I0231	M	4792	Russia_EBA_Yamnaya_Samara_published2	Samara Oblast, Volga River Valley, Southern Steppe, Ekaterinovka	Russia	52.7109	49.4669	NarasimhanPattersonScience2019 (previously MathiesonNature2015 which was 1240k of same sample with 390k in HaakLazaridis2015)	1240K	9.91	1103245
I0232	I0232	M	3475	Russia_Srubnaya	Samara Oblast, Volga River Valley, Tatarstan oblast, forest-steppe zone, Novosel'ki	Russia	48.1	54.44	NarasimhanPattersonScience2019 (supplement of MathiesonNature2018)	1240K	8.65	1112239
I0440	I0440	M	4727	Russia_Poltavka	Samara Oblast, Volga River Valley, Sok River, Lopatino II	Russia	53.64	50.655	MathiesonNature2015	1240K	4.95	1027134
I0719.SG	I0719	M	505	USA_AK_PaleoAleut.SG	Alaska, Aleutian Islands, Umnak Island, Chaluka Midden	USA	52.9884	-168.821	FlegontovNature2019	Shotgun	2.27	1040469
I0746	I0746	M	7930	Anatolia_N	Northwest Anatolia, Marmara, Barcƒ±n	Turkey	40.3037	29.6085	MathiesonNature2015	1240K	8.47	1003994
I0774.SG	I0774	F	1483	England_Saxon.SG	England, South Cambridgeshire, Oakington	Great Britain	52.2614	0.06869	SchiffelsNatureCommunications2016	Shotgun	5.42	1129556
I0777.SG	I0777	F	1478	England_Saxon.SG	England, South Cambridgeshire, Oakington	Great Britain	52.2614	0.06869	SchiffelsNatureCommunications2016	Shotgun	4.82	1123743
I0843	I0843	M	7853	Iberia_HG_brother.I0585	Leon, La Brana-Arintero	Spain	42.911	-5.3778	OlaldeScience2019	1240K	4.01	1018252
I10871.SG	I10871	M	7890	Cameroon_SMA.SG	Shum Laka	Cameroon	5.8586	10.0778	LipsonNature2020	Shotgun	18.51	1178281
I10873.SG	I10873	M	3070	Cameroon_SMA.SG	Shum Laka	Cameroon	5.8586	10.0778	LipsonNature2020	Shotgun	3.94	1121342
I1169	I1169	F	5950	Israel_C	Upper Galilee, Pki'in	Israel	32.9742	35.3314	HarneyMayNatureCommunications2018	1240K	9.47	1002682
I11974.SG	I11974	M	11885	Chile_LosRieles_12000BP.SG	Coquimbo, Los Vilos, Los Rieles	Chile	-31.92	-71.5	PosthNakatsukaCell2018	Shotgun	5.69	1158990
I1763	I1763	M	10074	Ukraine_Mesolithic	Vasil'evka	Ukraine	47.4342	35.2764	MathiesonNature2018	1240K	3.47	831221
I1819	I1819	M	10643	Ukraine_Mesolithic	Vasil'evka	Ukraine	47.4342	35.2764	MathiesonNature2018	1240K	3.44	813114
I1954	I1954	M	10093	Iran_GanjDareh_N	Ganj Dareh	Iran	34.45	48.116	NarasimhanPattersonScience2019	1240K	5	938523
I2495	I2495	M	4377	Anatolia_EBA	Mediterranean, Isparta, Harman√∂ren-G√∂nd√ºrle H√∂y√ºk	Turkey	37.9177	30.7084	LazaridisNature2017	1240K	8.02	1011604
I3921_all	I3921_all	M	1260	Vanuatu_1300BP_all	Epi Island, Burumbe	Vanuatu	-16.711	168.133	LipsonCurrentBiology2018	1240K	11.82	1035865
I4096_all	I4096_all	M	1305	Vanuatu_1300BP_all	Epi Island, Burumbe	Vanuatu	-16.711	168.133	LipsonCurrentBiology2018	1240K	9.88	1006847
I4105_all	I4105_all	M	150	Vanuatu_150BP_all	Epi Island, Wam Bay	Vanuatu	-16.89	168.3	LipsonCurrentBiology2018	1240K	7.29	1012081
I4106_all	I4106_all	M	140	Vanuatu_150BP_all	Epi Island, Wam Bay	Vanuatu	-16.89	168.3	LipsonCurrentBiology2018	1240K	11.83	1020436
I5235	I5235	M	10835	Serbia_Mesolithic_IronGates	Padina	Serbia	44.5959	22.0106	MathiesonNature2018	1240K	2.98	838984
I5236	I5236	M	10008	Serbia_Mesolithic_IronGates	Padina	Serbia	44.5959	22.0106	MathiesonNature2018	1240K	2.92	840166
I5239	I5239	F	10333	Serbia_Mesolithic_IronGates	Padina	Serbia	44.5959	22.0106	MathiesonNature2018	1240K	2.71	809534
I5240	I5240	M	10805	Serbia_Mesolithic_IronGates	Padina	Serbia	44.5959	22.0106	MathiesonNature2018	1240K	2.68	826331
I5241	I5241	F	11196	Serbia_Mesolithic_IronGates_daughter_I5236	Padina	Serbia	44.5959	22.0106	MathiesonNature2018	1240K	2.71	818133
I5242	I5242	F	10530	Serbia_Mesolithic_IronGates	Padina	Serbia	44.5959	22.0106	MathiesonNature2018	1240K	2.81	836819
I5244	I5244	F	10785	Serbia_Mesolithic_IronGates	Padina	Serbia	44.5959	22.0106	MathiesonNature2018	1240K	2.93	809448
I5320	I5320	M	725	USA_AK_Ancient_Athabaskan_1100BP_father.or.son.I5319	Alaska, western interior, Tochak McGrath, Upper Kuskokwim River	USA	62.9512	-155.595	FlegontovNature2019	1240K	12.79	1004830
I6747_all.SG	I6747_all	M	5539	England_N_all.SG	England, Derbyshire, Brassington, Carsington Pasture Cave	Great Britain	53.0798	-1.64094	BraceDiekmannNatureEcologyEvolution2019	Shotgun	13.2	1180398
I6767_all.SG	I6767_all	M	10300	England_Mesolithic_all.SG	England, Somerset, Cheddar, Gough's Cave	Great Britain	51.2817	-2.76575	BraceDiekmannNatureEcologyEvolution2019	Shotgun	3.76	1123721
I8218	I8218	F	1949	Pakistan_H_Aligrama	Swat Valley, Aligrama	Pakistan	34.8049	72.3182	NarasimhanPattersonScience2019	1240K	5.21	1001498
I9133.SG	I9133	M	1970	South_Africa_2000BP.SG	Faraoskop Rock Shelter	South Africa	-31.9804	18.5177	SkoglundCell2017	Shotgun	2.33	1028904
Iceman.SG	Iceman	M	5244	Italy_North_MN_Iceman_contam.SG	Trentino-South Tyrol, Oetz valley	Italy	46.77	10.83	KellerNatureCommunications2012	Shotgun	10.44	1162609
IL2.SG	IL2	F	1600	Peru_RioUncallane_1800BP.SG	Rio Ilave Basin, Rio Uncallane	Peru	-16.2	-69.7	LindoScienceAdvances2018	Shotgun	5.67	1145260
IL3.SG	IL3	F	1700	Peru_RioUncallane_1800BP.SG	Rio Ilave Basin, Rio Uncallane	Peru	-16.2	-69.7	LindoScienceAdvances2018	Shotgun	5.11	1142274
IL5.SG	IL5	F	1667	Peru_RioUncallane_1800BP.SG	Rio Ilave Basin, Rio Uncallane	Peru	-16.2	-69.7	LindoScienceAdvances2018	Shotgun	2.42	1051340
IL7.SG	IL7	M	1778	Peru_RioUncallane_1800BP.SG	Rio Ilave Basin, Rio Uncallane	Peru	-16.2	-69.7	LindoScienceAdvances2018	Shotgun	4.84	1169746
Inuk.SG	Inuk	M	3885	Greenland_Saqqaq.SG	Qeqertasussuk	Greenland	69.2438	-53.5413	RasmussenNature2010	Shotgun	14.14	1101700
IPK12.SG	IPK12	F	570	Chile_WesternArchipelago_Kaweskar_800BP.SG	Strait of Magellan, Punta Santa Mar√≠a	Chile	-53.35	-70.97	delaFuentePNAS2018	Shotgun	6.33	1142798
IPK13a.SG	IPK13a	M	1120	Chile_WesternArchipelago_Kaweskar_800BP.SG	Yekchal, Patagonia	Chile	-49.14	-74.45	delaFuentePNAS2018	Shotgun	2.48	1044915
IPY10.SG	IPY10	M	610	Chile_Yamana_BeagleChannel_800BP.SG	Beagle Channel, Puerto Williams	Chile	-54.93	-67.62	delaFuentePNAS2018	Shotgun	4.69	1173110
KK1.SG	KK1	M	9720	Georgia_Kotias.SG	Kotias Klde	Georgia	42.28	43.28	JonesNatureCommunications2015	Shotgun	12.48	1180629
Klei10.SG	Klei10	M	6063	Greece_LN.SG	Kleitos	Greece	..	..	HofmanovaPNAS2016	Shotgun	2.2	1038456
Kolyma_River.SG	Kolyma_River	M	9786	Kolyma_M.SG	Duvanni Yar	Russia	68.6	159.1	SikoraNature2019	Shotgun	14.99	1182088
Kostenki14	Kostenki14	M	37470	Russia_Kostenki14	Kostenki	Russia	51.23	39.3	FuNature2016	1240K	16.14	1095867
Kretuonas4	Kretuonas4	F	6150	Lithuania_EMN_Narva	Kretuonas 1B	Lithuania	..	..	MittnikNatureCommunications2018	1240K	8.49	1006360
kzb002.SG	kzb002	M	3721	Russia_Srubnaya_Alakul.SG	Republic of Bashkorstan, Near Usmanovo village, Kazburun 1	Russia	..	..	KrzewinskaScienceAdvances2018	Shotgun	2.92	1107285
kzb007.SG	kzb007	M	3705	Russia_Srubnaya_Alakul.SG	Republic of Bashkorstan, Near Usmanovo village, Kazburun 1	Russia	..	..	KrzewinskaScienceAdvances2018	Shotgun	2.44	1072298
LaBrana1_published.SG	LaBrana1	M	7815	Iberia_HG_published.SG	Leon, La Brana-Arintero	Spain	42.911	-5.3778	OlaldeNature2014	Shotgun	3.52	1079840
Latvia_HG2.SG	Latvia_HG2	M	7689	Latvia_HG.SG	Zvejnieki	Latvia	56.2833	25.1333	JonesCurrentBiology2017	Shotgun	3.43	1132063
Les_Cottes_final_provisional.SG	Les_Cottes_final_provisional	F	43230	LesCottes_Neanderthal.SG	Les Cottes	France	..	..	HajdinjakNature2018	Shotgun	1.83	919949
Loschbour_published.DG	Loschbour	M	8050	Luxembourg_Loschbour_published.DG	Echternach	Luxembourg	49.81	6.4	LazaridisNature2014	Shotgun.diploid	22	1139327
Lovelock2.SG	Lovelock2	F	1880	USA_Nevada_LovelockCave_1850BP.SG	Lovelock Cave, Nevada, US	USA	39.96	-118.56	MorenoMayarScience2018	Shotgun	14.36	1150497
Lovelock3.SG	Lovelock3	F	627	USA_Nevada_LovelockCave_600BP.SG	Lovelock Cave, Nevada, US	USA	39.96	-118.56	MorenoMayarScience2018	Shotgun	18.13	1150692
LU339.SG	LU339	U	6798	Iberia_MN_BA.SG	Lorga de Din	Portugal	41.7083	-6.92778	GonzalesFortesProcRoyalSocB2019	Shotgun	3.47	1124350
LugarCanto42.SG	LugarCanto42	F	5950	Iberia_MN.SG	Lugar do Canto	Portugal	..	..	MartinianoPLoSGenetics2017	Shotgun	3.05	1089508
M96.SG	M96	M	8825	Romania_Mesolithic_IronGates.SG	Schela Cladovei	Romania	44.6297	22.6126	GonzalesFortesCurrentBiology2017	Shotgun	2.67	1075084
MA1.SG	MA1	M	24305	Russia_MA1_HG.SG	Mal'ta	Russia	52.9	103.5	RaghavanNature2013	Shotgun	1.21	820035
Mezmaiskaya1_final_provisional.SG	Mezmaiskaya1_final_provisional	F	51950	Mezmaiskaya1_Neanderthal.SG	Mezmaiskaya	Russia	44.1667	40	HajdinjakNature2018	Shotgun	0.94	670280
Mezmaiskaya2_final_provisional.SG	Mezmaiskaya2_final_provisional	M	43780	Mezmaiskaya2_Neanderthal.SG	Mezmaiskaya	Russia	44.1667	40	HajdinjakNature2018	Shotgun	1.3	837728
mfo001.SG	mfo001	F	378	South_Africa_400BP.SG	Mfongosi	South Africa	..	..	SchlebuschScience2017	Shotgun	6.52	1147468
mota.SG	mota	M	4472	Ethiopia_4500BP_published.SG	Gamo Highlands, Mota Cave	Ethiopia	6.79749	38.2079	LlorenteScience2015	Shotgun	11.29	1181617
mur.SG	mur	M	7136	Iberia_EN.SG	Andalusia, MurcieÃÅlagos de Zuheros	Spain	..	..	ValdioseraPNAS2018	Shotgun	2.88	1078491
mur003.SG	mur003	M	3734	Russia_Srubnaya_Alakul.SG	Republic of Bashkorstan, Near Usmanovo Village, Muradym 8	Russia	..	..	KrzewinskaScienceAdvances2018	Shotgun	2.46	1075122
N17.SG	N17	M	3846	Poland_EBA.SG	Gustorzyn	Poland	52.66	18.88	FernandesScientificReports2018	Shotgun	2.46	1074631
N19.SG	N19	F	5462	Poland_TRB.SG	Pikutkowo	Poland	52.62	18.96	FernandesScientificReports2018	Shotgun	2.1	1004527
N25.SG	N25	F	6250	Poland_BKG.SG	Oslonki	Poland	52.61	18.8	FernandesScientificReports2018	Shotgun	2.49	1055361
N26.SG	N26	M	6151	Poland_BKG.SG	Konary	Poland	50.67	21.38	FernandesScientificReports2018	Shotgun	2.27	1049737
N27.SG	N27	M	6250	Poland_BKG.SG	Oslonki	Poland	52.61	18.8	FernandesScientificReports2018	Shotgun	1.93	1003248
N38.SG	N38	F	5033	Poland_GAC.SG	Brzesc Kujawski	Poland	52.61	18.9	FernandesScientificReports2018	Shotgun	2.21	1022642
N44.SG	N44	F	4405	Poland_CWC_o.SG	Pikutkowo	Poland	52.62	18.96	FernandesScientificReports2018	Shotgun	2.19	1017645
N45.SG	N45	F	4405	Poland_CWC_o.SG	Pikutkowo	Poland	52.62	18.96	FernandesScientificReports2018	Shotgun	2.47	1050046
N47.SG	N47	M	4405	Poland_CWC.SG	Pikutkowo	Poland	52.62	18.96	FernandesScientificReports2018	Shotgun	2.43	1074445
N49.SG	N49	M	4405	Poland_CWC.SG	Pikutkowo	Poland	52.62	18.96	FernandesScientificReports2018	Shotgun	2.22	1045306
NE1.SG	NE1	F	7139	Hungary_LBK_MN.SG	Polg√°r Ferenci h√°t	Hungary	47.8465	21.1494	GambaNatureCommunications2014	Shotgun	19.27	1152433
NEO236.SG	NEO236	F	7678	DevilsCave_N.SG	Devil's Gate Cave	Russia	44.5	135.4	SikoraNature2019	Shotgun	2.52	1056280
NEO240.SG	NEO240	F	7508	DevilsCave_N.SG	Devil's Gate Cave	Russia	44.5	135.4	SikoraNature2019	Shotgun	6.84	1147984
new001.SG	new001	F	418	South_Africa_400BP.SG	Newcastle	South Africa	..	..	SchlebuschScience2017	Shotgun	11.07	1150129
PC537.SG	PC537	F	995	Bahamas_Taino.SG	Eleuthera, Preacher's Cave	Bahamas	25.5571	-76.6952	SchroederPNAS2018	Shotgun	9.18	1149637
prs002-ALL_DATA.SG	prs002-ALL_DATA	F	5675	Ireland_Megalithic.SG	Primrose Grange	Ireland	54.2469	-8.55609	SanchezQuintoPNAS2019	Shotgun	3.76	1119566
prs009-ALL_DATA.SG	prs009-ALL_DATA	M	5380	Ireland_Megalithic.SG	Midhowe Chambered Cairn	Great Britain	59.1565	-3.09914	SanchezQuintoPNAS2019	Shotgun+whole.genome.capture	3.46	1122257
prs013-ALL_DATA.SG	prs013-ALL_DATA	M	5450	Ireland_Megalithic.SG	Primrose Grange	Ireland	54.2469	-8.55609	SanchezQuintoPNAS2019	Shotgun+whole.genome.capture	4.23	1145014
prs016-ALL_DATA.SG	prs016-ALL_DATA	M	5560	Ireland_Megalithic.SG	Primrose Grange	Ireland	54.2469	-8.55609	SanchezQuintoPNAS2019	Shotgun	4.35	1161741
R1.SG	R1	F	2835	Italy_IA_Republic.SG	Martinsicuro	Italy	42.8801	13.8938	AntonioGaoMootsScience2019	Shotgun	4.29	1125318
R11.SG	R11	M	11908	Italy_Mesolithic.SG	Grotta Continenza	Italy	41.96	13.54	AntonioGaoMootsScience2019	Shotgun	1.01	750119
R136.SG	R136	M	1550	Italy_LA.SG	Marcellino & Pietro	Italy	41.8892	12.5007	AntonioGaoMootsScience2019	Shotgun	2.03	1017312
R15.SG	R15	M	9125	Italy_Mesolithic.SG	Grotta Continenza	Italy	41.96	13.54	AntonioGaoMootsScience2019	Shotgun	3.36	1126562
R2.SG	R2	F	7984	Italy_N.SG	Grotta Continenza	Italy	41.96	13.54	AntonioGaoMootsScience2019	Shotgun	4.01	1119222
R3.SG	R3	F	7730	Italy_N.SG	Grotta Continenza	Italy	41.96	13.54	AntonioGaoMootsScience2019	Shotgun	4.42	1126622
R31.SG	R31	M	1531	Italy_LA_oCentralEuropean.SG	Mausoleo di Augusto	Italy	41.906	12.4742	AntonioGaoMootsScience2019	Shotgun	2.16	1036915
R4.SG	R4	M	4865	Italy_C.SG	Grotta Continenza	Italy	41.96	13.54	AntonioGaoMootsScience2019	Shotgun	3.93	1145669
R42.SG	R42	F	1879	Italy_Imperial.SG	Isola Sacra	Italy	41.7479	12.2595	AntonioGaoMootsScience2019	Shotgun	4.15	1122927
R473.SG	R473	F	2600	Italy_IA_Republic.SG	Civitavecchia	Italy	42.0889	11.7656	AntonioGaoMootsScience2019	Shotgun	2.5	1046443
R63.SG	R63	M	960	Italy_Medieval_EarlyModern_oCentralEuropean.SG	Villa Magna	Italy	41.6877	13.0865	AntonioGaoMootsScience2019	Shotgun	2.16	1038196
R64.SG	R64	M	840	Italy_Medieval_EarlyModern.SG	Villa Magna	Italy	41.6877	13.0865	AntonioGaoMootsScience2019	Shotgun	2.12	1030419
R65.SG	R65	F	840	Italy_Medieval_EarlyModern.SG	Villa Magna	Italy	41.6877	13.0865	AntonioGaoMootsScience2019	Shotgun	2.21	1019653
R7.SG	R7	M	10682	Italy_Mesolithic.SG	Grotta Continenza	Italy	41.96	13.54	AntonioGaoMootsScience2019	Shotgun	3.44	1129613
R80.SG	R80	F	1874	Italy_Imperial.SG	Viale Rossini (Necropoli Salaria)	Italy	41.9207	12.4895	AntonioGaoMootsScience2019	Shotgun	2.13	1000479
R9.SG	R9	M	7496	Italy_N.SG	Grotta Continenza	Italy	41.96	13.54	AntonioGaoMootsScience2019	Shotgun	4.5	1153527
R969.SG	R969	M	300	Italy_Medieval_EarlyModern.SG	Tivoli Palazzo Cianti	Italy	41.9559	12.7543	AntonioGaoMootsScience2019	Shotgun	2.62	1085089
rath1.SG	rath1	M	3906	Ireland_BA.SG	Rathlin Island, County Antrim	Ireland	55.2921	-6.19168	CassidyPNAS2016	Shotgun	11.63	1181857
RISE1159.SG	RISE1159	F	4730	Poland_Koszyce_GAC.SG	Koszyce, site 3	Poland	48.7	21.2	SchroederPNAS2019	Shotgun	2.66	1068129
RISE1162.SG	RISE1162	M	4747	Poland_Koszyce_GAC.SG_daughter.RISE1170.SG.sister.RISE1164.SG	Koszyce, site 3	Poland	48.7	21.2	SchroederPNAS2019	Shotgun	2.86	1104048
RISE1163.SG	RISE1163	M	4735	Poland_Koszyce_GAC.SG	Koszyce, site 3	Poland	48.7	21.2	SchroederPNAS2019	Shotgun	3.81	1147530
RISE1165.SG	RISE1165	M	4743	Poland_Koszyce_GAC.SG	Koszyce, site 3	Poland	48.7	21.2	SchroederPNAS2019	Shotgun	2.1	1025600
RISE1166.SG	RISE1166	F	4908	Poland_Koszyce_GAC.SG	Koszyce, site 3	Poland	48.7	21.2	SchroederPNAS2019	Shotgun	2.83	1079562
RISE1167.SG	RISE1167	F	4728	Poland_Koszyce_GAC.SG_daughter.RISE1166.SG.sister.RISE1171.SG	Koszyce, site 3	Poland	48.7	21.2	SchroederPNAS2019	Shotgun	2.34	1039137
RISE1168.SG	RISE1168	M	4676	Poland_Koszyce_GAC.SG_brother.RISE1169.SG.brother.RISE1173.SG.brother.RISE1163.SG	Koszyce, site 3	Poland	48.7	21.2	SchroederPNAS2019	Shotgun	2.35	1063074
RISE1170.SG	RISE1170	F	4749	Poland_Koszyce_GAC.SG	Koszyce, site 3	Poland	48.7	21.2	SchroederPNAS2019	Shotgun	3.53	1112811
RISE1171.SG	RISE1171	M	4768	Poland_Koszyce_GAC.SG_son.RISE1166.SG.brother.RISE1167.SG	Koszyce, site 3	Poland	48.7	21.2	SchroederPNAS2019	Shotgun	2.47	1075219
RISE1172.SG	RISE1172	F	4675	Poland_Koszyce_GAC.SG_mother.RISE1163.SG.mother.RISE1173.SG	Koszyce, site 3	Poland	48.7	21.2	SchroederPNAS2019	Shotgun	2.81	1076411
RISE1173.SG	RISE1173	M	4634	Poland_Koszyce_GAC.SG_brother.RISE1169.SG.brother.RISE1168.SG.brother.RISE1163.SG	Koszyce, site 3	Poland	48.7	21.2	SchroederPNAS2019	Shotgun	2.75	1097337
RISE493.SG	RISE493	M	3429	Russia_Karasuk.SG	Sabinka 2	Russia	53.152	91.05	AllentoftNature2015	Shotgun	8.08	1145689
RISE495.SG	RISE495	M	3100	Russia_Karasuk.SG	Arban 1	Russia	52.954	90.187	AllentoftNature2015	Shotgun	4.39	1129596
RISE496.SG	RISE496	F	3288	Russia_Karasuk.SG	Arban 1	Russia	52.954	90.187	AllentoftNature2015	Shotgun	3.03	1014261
RISE497.SG	RISE497	F	3100	Russia_Karasuk_o.SG	Arban 1	Russia	52.954	90.187	AllentoftNature2015	Shotgun	9.09	1134584
RISE505.SG	RISE505	F	3636	Russia_Andronovo.SG	Kytmanovo	Russia	53.456	85.447	AllentoftNature2015	Shotgun	5.28	1122100
RISE511.SG	RISE511	F	4744	Russia_Afanasievo_sister.I3387_mother.I6711.SG	Middle Yenisei region, Afanasieva Gora	Russia	54.3566	90.9192	AllentoftNature2015	Shotgun	3.76	1060524
RISE523.SG	RISE523	F	3448	Russia_Mezhovskaya.SG	Kapova cave	Russia	53.043	57.066	AllentoftNature2015	Shotgun	2.74	1024216
RISE664.SG	RISE664	M	4283	Russia_BA_Okunevo.SG	Okunev Ulus	Russia	53.5478	91.0256	DamgaardScience2018	Shotgun	4.6	1121362
RISE674.SG	RISE674	M	4079	Russia_BA_Okunevo.SG	Verkhni Askiz	Russia	53.1565	90.2078	DamgaardScience2018	Shotgun	2.6	1037305
RISE98.SG	RISE98	M	4104	Sweden_LN.SG	L Beddinge 56	Sweden	55.381	13.445	AllentoftNature2015	Shotgun	6.13	1089349
S10.SG	S10	M	1500	Nepal_Samdzong_1500BP.SG	Samdzong Tomb, Nepal	Nepal	..	..	JeongPNAS2016	Shotgun	3.26	1124932
S35.SG	S35	M	1500	Nepal_Samzdong_1500BP.SG	Samdzong Tomb, Nepal	Nepal	..	..	JeongPNAS2016	Shotgun	3.72	1135160
S41.SG	S41	M	1500	Nepal_Samzdong_1500BP.SG	Samdzong Tomb, Nepal	Nepal	..	..	JeongPNAS2016	Shotgun	2.19	1023924
SATP.SG	SATP	M	13255	Georgia_Satsurblia.SG	Satsurblia	Georgia	42.38	42.59	JonesNatureCommunications2015	Shotgun	1.19	816136
SBT-A-1_38.SG	SBT-A-1_38	M	1015	Iceland_Pre_Christian.SG	Smyrlaberg	Iceland	..	..	EbenesersdottirScience2018	Shotgun	2.34	1043109
SC-05.SG	SC-05	F	1051	LSCI.SG	San Clemente Island, CA	USA	32.9	-118.5	ScheibScience2018	Shotgun	4.3	1107916
scy009.SG	scy009	M	2550	Ukraine_Scythian.SG	Cherkasy Region, Gorodische District, Starosillya	Ukraine	46.323	29.4702	KrzewinskaScienceAdvances2018	Shotgun	2.16	1038655
SF12.SG	SF12	F	8895	Sweden_Mesolithic.SG	Stora F√∂rvar	Sweden	..	..	GuntherPLoSBiology2018	Shotgun	65.17	1116314
SI-41.SG	SI-41	M	724	Lebanon_Medieval_o1.SG	Sidon	Lebanon	33.5606	35.3981	HaberAJHG2018	Shotgun	3	1090200
SI-45.SG	SI-45	M	702	Lebanon_Medieval.SG	Sidon	Lebanon	33.5606	35.3981	HaberAJHG2018	Shotgun	3.6	1131953
SI-53.SG	SI-53	M	861	Lebanon_Medieval_o4.SG	Sidon	Lebanon	33.5606	35.3981	HaberAJHG2018	Shotgun	4.36	1145131
Sidelkino.SG	Sidelkino	F	11259	Russia_Sidelkino_HG.SG	Sidelkino	Russia	54.53	51.11	DamgaardScience2018	Shotgun	1.97	967604
SN-44.SG	SN-44	M	5337	USA_CA_Early_SanNicolas.SG	San Nicolas Island, CA	USA	33.2643	-119.539	ScheibScience2018	Shotgun	3.1	1111229
SSG-A-2_38.SG	S-A-2_38	M	1025	Iceland_Pre_Christian.SG	Silastadir	Iceland	..	..	EbenesersdottirScience2018	Shotgun	4.18	1145149
SSG-A-4_38.SG	S-A-4_38	F	1025	Iceland_Pre_Christian.SG	Silastadir	Iceland	..	..	EbenesersdottirScience2018	Shotgun	3.27	1076496
STT-A-2_38.SG	STT-A-2_38	M	1000	Iceland_Pre_Christian.SG	Straumur	Iceland	..	..	EbenesersdottirScience2018	Shotgun	3.16	1110874
Stuttgart_published.DG	Stuttgart	F	7140	Germany_EN_LBK_Stuttgart_published.DG	Stuttgart-Muehlhausen, Viesenhaeuser Hof	Germany	48.78	9.18	LazaridisNature2014	Shotgun.diploid	19	1130723
Sumidouro4.SG	Sumidouro4	M	10096	Brazil_Sumidouro_10100BP.SG	Caverna do Sumidouro, Lagoa Santa, Brazil	Brazil	-19.54	-43.94	MorenoMayarScience2018	Shotgun	0.73	606831
Sumidouro5.SG	Sumidouro5	M	10405	Brazil_Sumidouro_10100BP.SG	Caverna do Sumidouro, Lagoa Santa, Brazil	Brazil	-19.54	-43.94	MorenoMayarScience2018	Shotgun	13.63	1180724
Sumidouro6.SG	Sumidouro6	M	10154	Brazil_Sumidouro_10100BP.SG	Caverna do Sumidouro, Lagoa Santa, Brazil	Brazil	-19.54	-43.94	MorenoMayarScience2018	Shotgun	1.8	965237
Sunghir1.SG	Sunghir1	M	32823	Russia_Sunghir1.SG	Sunghir	Russia	56.1761	40.5025	SikoraScience2017	Shotgun	1.28	809229
Sunghir2.SG	Sunghir2	M	34234	Russia_Sunghir2.SG	Sunghir	Russia	56.1761	40.5025	SikoraScience2017	Shotgun	4.62	1164216
Sunghir3.SG	Sunghir3	M	34093	Russia_Sunghir3.SG	Sunghir	Russia	56.1761	40.5025	SikoraScience2017	Shotgun	12.03	1181712
Sunghir4.SG	Sunghir4	M	33992	Russia_Sunghir4.SG	Sunghir	Russia	56.1761	40.5025	SikoraScience2017	Shotgun	4.4	1160873
Sunghir6.SG	Sunghir6	M	790	Russia_Sunghir6.SG	Sunghir	Russia	56.1761	40.5025	SikoraScience2017	Shotgun	4.88	1164717
SZ1.SG	SZ1	M	1250	Hungary_AvarPeriod.SG	Sz√≥l√°d	Hungary	46.2833	17.85	AmorimNatureCommunications2018	Shotgun	9.28	1181117
SZ11.SG	SZ11	M	1442	Hungary_Langobard.SG	Sz√≥l√°d	Hungary	46.2833	17.85	AmorimNatureCommunications2018	Shotgun	9.28	1180814
SZ15.SG	SZ15	M	1442	Hungary_Langobard.SG	Sz√≥l√°d	Hungary	46.2833	17.85	AmorimNatureCommunications2018	Shotgun	10.83	1181035
SZ2.SG	SZ2	M	1442	Hungary_Langobard.SG	Sz√≥l√°d	Hungary	46.2833	17.85	AmorimNatureCommunications2018	Shotgun	6.33	1176754
SZ3.SG	SZ3	M	1442	Hungary_Langobard.SG	Sz√≥l√°d	Hungary	46.2833	17.85	AmorimNatureCommunications2018	Shotgun	5.76	1181309
SZ36.SG	SZ36	M	1442	Hungary_Langobard.SG	Sz√≥l√°d	Hungary	46.2833	17.85	AmorimNatureCommunications2018	Shotgun	5.76	1173847
SZ4.SG	SZ4	M	1442	Hungary_Langobard.SG	Sz√≥l√°d	Hungary	46.2833	17.85	AmorimNatureCommunications2018	Shotgun	11.76	1181245
SZ43.SG	SZ43	M	1431	Hungary_Langobard.SG	Sz√≥l√°d	Hungary	46.2833	17.85	AmorimNatureCommunications2018	Shotgun	11.76	1181334
SZ45.SG	SZ45	M	1442	Hungary_Langobard.SG	Sz√≥l√°d	Hungary	46.2833	17.85	AmorimNatureCommunications2018	Shotgun	10.74	1181237
SZ5.SG	SZ5	M	1442	Hungary_Langobard.SG	Sz√≥l√°d	Hungary	46.2833	17.85	AmorimNatureCommunications2018	Shotgun	6.25	1176362
TAF010	TAF010	M	14605	Morocco_Iberomaurusian	Taforalt	Morocco	34.8078	-2.41089	vandeLoosdrechtScience2018	1240K	3.06	846250
TAF011	TAF011	M	14500	Morocco_Iberomaurusian	Taforalt	Morocco	34.8078	-2.41089	vandeLoosdrechtScience2018	1240K	8.26	1037723
TAF013	TAF013	M	14500	Morocco_Iberomaurusian	Taforalt	Morocco	34.8078	-2.41089	vandeLoosdrechtScience2018	1240K	7.17	998988
TAF014	TAF014	M	14500	Morocco_Iberomaurusian	Taforalt	Morocco	34.8078	-2.41089	vandeLoosdrechtScience2018	1240K	5.8	986561
Tianyuan	Tianyuan	M	39475	China_Tianyuan	Tianyuan	China	39.39	115.52	YangCurrentBiology2017	1240K	4.75	901237
USR1.SG	USR1	F	11435	USA_Ancient_Beringian.SG	Upward Sun River	USA	..	..	MorenoMayarNature2017	Shotgun	17	1150886
Ust_Ishim_published.DG	Ust_Ishim	M	45020	Russia_Ust_Ishim_HG_published.DG	Ust'-Ishim, Siberia	Russia	57.7	71.1	FuNature2014	Shotgun.diploid	42	1147829
Vestonice16	Vestonice16	M	30010	Czech_Vestonice16	Dolni Vestonice	Czech Republic	48.53	16.39	FuNature2016	1240K	1	745560
vik_84001.SG	vik_84001	M	989	Sweden_Viking.SG	Sigtuna, cemetery 1 (Nunnnan)	Sweden	59.6173	17.7236	KrzewinskaCurrentBiology2018	Shotgun	3.68	1141127
vik_grt035.SG	vik_grt035	M	996	Sweden_Viking.SG	Sigtuna, church 1 (St. Gertrud)	Sweden	59.6173	17.7236	KrzewinskaCurrentBiology2018	Shotgun	3.29	1128667
vik_grt036.SG	vik_grt036	M	878	Sweden_Viking.SG	Sigtuna, church 1 (St. Gertrud)	Sweden	59.6173	17.7236	KrzewinskaCurrentBiology2018	Shotgun	2.2	1041345
vik_stg021.SG	vik_stg021	F	924	Sweden_Viking.SG	Sigtuna, church 1 (St. Gertrud)	Sweden	59.6173	17.7236	KrzewinskaCurrentBiology2018	Shotgun	3.49	1085641
Villabruna	Villabruna	M	13980	Italy_North_Villabruna_HG	Veneto, Villabruna	Italy	46.15	12.21	FuNature2016	1240K	3.14	902419
Vindija_snpAD.DG	Vindija	F	41950	Vindija.DG	Vindija Cave	Croatia	46.2992	16.0706	Pruefer2017	Shotgun.diploid	30	1061414
VindijaG1_final_provisional.SG	VindijaG1_final_provisional	F	51950	VindijaG1_Neanderthal.SG	Vindija Cave	Croatia	46.2992	16.0706	HajdinjakNature2018	Shotgun	0.94	684735
WC1.SG	WC1	M	9219	Iran_Wezmeh_N.SG	Wezmeh Cave, Central Zagros	Iran	34.6129	47.1057	BroushakiScience2016	Shotgun	10.39	1180203
Yamnaya.SG	Yamnaya	F	4903	Kazakhstan_EBA_Yamnaya.SG	Karagash	Kazakhstan	49.1342	75.8518	DamgaardScience2018	Shotgun	25.2	1182098
Yana_old.SG	Yana_old	M	31950	Yana_UP.SG	Yana RHS	Russia	70.72	135.42	SikoraNature2019	Shotgun	24.32	1182458
Yana_old2.SG	Yana_old2	M	31950	Yana_UP.SG	Yana RHS	Russia	70.72	135.42	SikoraNature2019	Shotgun	7.22	1178800
ZBC_IPB001.B-C0101_Luk2-Pinarbasi	ZBC_IPB001B-C0101_Luk2-Pinarbasi	M	15405	Anatolia_Epipaleolithic	Pƒ±narbasÃßI	Turkey	37.4833	33.0333	FeldmanNatureCommunications2019	1240k	2.35	863964
