# Supplementary material for: Genetic and climatic factors in the dispersal of Anatomically Modern Humans Out of Africa
Source: Research Square preprint supplement (doi:10.21203/rs.3.rs-800178/v1), 2021-08-24
Supplement: Supplementary file 6 [file d576e50bc3c206b8de6a78f6.xlsx]

## Sheet: SI_table.iSAFE_summary
		Proportion of top iSAFE SNPs					Gene ID and # SNPs
Sweep Region	Sweep Label	1st	2nd	3rd	4th	5th	1st	2nd	3rd	4th	5th
15:48.4-48.9	FBN1	1	0	0	0	0	FBN1 [20/83]	MYEF2 [0/3]	DUT [0/4]	SLC12A1 [0/40]	SLC24A5 [0/0]
17:58-59.5	BCAS3	1	0	0	0	0	BCAS3 [20/236]	PPM1D [0/1]	APPBP2 [0/2]	C17orf64 [0/4]	CA4 [0/7]
2:84.7-85.1	DNAH6	1	0	0	0		DNAH6 [20/123]	SUCLG1 [0/8]	TRABD2A [0/56]	TMSB10 [0/0]
3:50.4-52.2	DOCK3	1	0	0	0	0	DOCK3 [20/289]	IQCF2 [0/1]	PCBP4 [0/1]	DUSP7 [0/1]	HEMK1 [0/2]
5:109.6-110.1	TMEM232	1	0	0			TMEM232 [20/180]	SLC25A46 [0/10]	MIR548F3 [0/0]
5:144.9-145.9	PRELID2	1	0	0	0	0	PRELID2 [20/192]	GRXCR2 [0/2]	PLAC8L1 [0/9]	TCERG1 [0/38]	LARS [0/46]
4:78.1-78.5	CCNG2	1	0				CCNG2 [20/255]	CXCL13 [0/25]
7:36.9-37.5	ELMO1	1	0				ELMO1 [20/343]	MIR1200 [0/0]
3:9.8-11	FANCD2	0.95	0.55	0	0	0	FANCD2 [19/49]	FANCD2OS [11/16]	RPUSD3 [0/2]	PRRT3 [0/3]	JAGN1 [0/4]
6:12.7-13.5	TBC1D7	0.95	0.15	0			TBC1D7 [19/44]	PHACTR1 [3/278]	GFOD1 [0/72]
2:237.5-238.8	MLPH	0.9	0	0	0	0	MLPH [18/56]	ACKR3 [0/3]	COPS8 [0/3]	RBM44 [0/17]	RAB17 [0/25]
2:196.6-197	DNAH7	0.9	0				DNAH7 [18/136]	STK17B [0/20]
11:45.7-46.9	AMBRA1	0.7	0.15	0.1	0.05	0	AMBRA1 [14/61]	ATG13 [3/22]	HARBI1 [2/6]	DGKZ [1/13]	ZNF408 [0/2]
17:34.1-34.3	TAF15	0.65	0.1	0	0	0	TAF15 [13/24]	CCL5 [2/5]	GAS2L2 [0/3]	C17orf50 [0/3]	LYZL6 [0/3]
2:158.1-158.3	GALNT5	0.65	0	0			GALNT5 [13/32]	CYTIP [0/26]	ERMN [0/0]
6:34.4-35.5	PPARD	0.65	0	0	0	0	PPARD [13/38]	RPL10A [0/1]	SPDEF [0/5]	TAF11 [0/5]	FANCE [0/5]
22:46.5-46.9	GTSE1	0.6	0.2	0.15	0	0	GTSE1 [12/22]	TRMU [4/10]	TTC38 [3/16]	CDPF1 [0/8]	PKDREJ [0/8]
12:27.5-27.8	SMCO2	0.6	0	0			SMCO2 [12/15]	ARNTL2 [0/47]	PPFIBP1 [0/109]
18:71.7-72	FBXO15	0.6	0	0	0		FBXO15 [12/32]	TIMM21 [0/3]	CYB5A [0/22]	C18orf63 [0/33]
2:109.3-109.6	CCDC138	0.55	0.3	0			CCDC138 [11/49]	RANBP2 [6/32]	EDAR [0/50]
8:67.3-68.3	ARFGEF1	0.55	0.1	0.1	0.1	0.05	ARFGEF1 [11/41]	SGK3 [2/5]	CSPP1 [2/6]	C8orf44-SGK3 [2/7]	COPS5 [1/2]
13:29.6-30.2	SLC7A1	0.55	0				SLC7A1 [11/43]	MTUS2 [0/326]
5:74.4-75	COL4A3BP	0.5	0.4	0.05	0	0	COL4A3BP [10/51]	POLK [8/30]	ANKDD1B [1/24]	HMGCR [0/9]	POC5 [0/26]
3:128.6-129.6	TMCC1	0.5	0.1	0.05	0	0	TMCC1 [10/72]	IFT122 [2/38]	RHO [1/3]	RAB43 [0/1]	ISY1 [0/2]
1:204.6-205	NFASC	0.5	0				NFASC [10/98]	LRRN2 [0/35]
15:42.5-43.5	VPS39	0.45	0.35	0.15	0.05	0	GANC [9/47]	TMEM87A [7/26]	CAPN3 [3/29]	ZNF106 [1/31]	CCNDBP1 [0/8]
12:109.9-113.9	KCTD10	0.45	0.3	0.15	0.1	0	HECTD4 [9/61]	NAA25 [6/21]	MAPKAPK5 [3/30]	TMEM116 [2/33]	VPS29 [0/2]
10:74.7-75.7	OIT3	0.4	0.25	0.15	0.1	0.05	ANXA7 [8/17]	USP54 [5/32]	DNAJC9 [3/27]	PPP3CB [2/8]	MRPS16 [1/3]
1:35.4-36.5	ZMYM6	0.4	0.2	0.1	0.05	0	KIAA0319L [8/15]	ZMYM4 [4/9]	PSMB2 [2/4]	NCDN [1/1]	ZMYM6 [0/1]
13:48.8-49.3	ITM2B	0.35	0.3	0.15	0	0	RB1 [7/16]	RCBTB2 [6/8]	LPAR6 [3/3]	CYSLTR2 [0/1]	ITM2B [0/8]
7:97.9-99.3	BAIAP2L1	0.35	0.3	0.15	0.15	0.1	PTCD1 [7/18]	ARPC1A [6/29]	CPSF4 [3/7]	ARPC1B [3/11]	BUD31 [2/4]
10:118.1-118.4	PNLIPRP3	0.35	0	0	0		PNLIPRP3 [7/22]	PNLIP [0/3]	CCDC172 [0/6]	PNLIPRP1 [0/11]
15:43.7-44.5	TP53BP1	0.35	0	0	0	0	TP53BP1 [7/58]	CKMT1B [0/5]	MAP1A [0/6]	SERF2 [0/9]	CATSPER2 [0/11]
1:170.9-171.3	FMO2	0.3	0	0	0	0	FMO2 [6/17]	FMO3 [0/19]	FMO1 [0/22]	MROH9 [0/79]	MIR1295A [0/0]
12:57.9-58.2	MARS	0.25	0.2	0.15	0.15	0.05	OS9 [5/14]	TSFM [4/11]	AGAP2 [3/5]	AVIL [3/7]	CDK4 [1/2]
6:27.8-28.5	HIST1H2BL	0.2	0.15	0.1	0.1	0.05	ZKSCAN8 [4/8]	ZSCAN31 [3/18]	ZSCAN9 [2/7]	PGBD1 [2/11]	ZNF165 [1/4]
16:0.8-2	MIR662	0.2	0.05	0.05	0	0	HAGH [4/40]	FAHD1 [1/18]	IFT140 [1/68]	GNG13 [0/1]	TPSAB1 [0/1]
6:29.5-32.8	GABBR1	0.2	0	0	0	0	RNF39 [4/10]	ZNRD1 [0/1]	TRIM15 [0/1]	HLA-E [0/1]	PRR3 [0/1]
16:66.5-68	BEAN1	0.1	0.1	0.05	0.05	0.05	ZDHHC1 [2/3]	CTCF [2/26]	PLEKHG4 [1/5]	HSD11B2 [1/5]	ATP6V0D1 [1/6]
7:142.6-142.8	EPHB6	0.05	0	0	0	0	OR6V1 [1/1]	EPHB6 [0/2]	KEL [0/5]	PIP [0/8]	TRPV6 [0/12]
10:22.6-23	COMMD3	0	0	0	0	0	COMMD3-BMI1 [0/1]	SPAG6 [0/10]	PIP4K2A [0/109]	COMMD3 [0/0]	BMI1 [0/0]
16:72-72.2	DHODH	0	0	0	0	0	HP [0/6]	DHODH [0/10]	HPR [0/12]	DHX38 [0/13]	TXNL4B [0/37]
3:15.4-15.7	METTL6	0	0	0	0	0	EAF1 [0/6]	HACL1 [0/15]	METTL6 [0/22]	BTD [0/22]	COLQ [0/42]
4:71.5-72.4	ENAM	0	0	0	0	0	GRSF1 [0/4]	RUFY3 [0/6]	DCK [0/7]	MOB1B [0/10]	ENAM [0/14]
6:105.4-105.6	LIN28B	0	0	0			POPDC3 [0/15]	BVES [0/23]	LIN28B [0/54]
8:42.6-43.1	CHRNB3	0	0	0	0	0	THAP1 [0/1]	POMK [0/4]	RNF170 [0/7]	CHRNB3 [0/11]	FNTA [0/13]
8:47.7-49.6	LINC00293	0	0	0	0	0	CEBPD [0/2]	MCM4 [0/5]	EFCAB1 [0/13]	LINC00293 [0/14]	UBE2V2 [0/14]
9:101.5-102	ANKS6	0	0	0	0	0	ALG2 [0/1]	SEC61B [0/3]	GALNT12 [0/20]	TGFBR1 [0/20]	ANKS6 [0/27]
10:32.7-33.3	CCDC7	0	0				ITGB1 [0/51]	CCDC7 [0/91]
17:53.8-53.9	TMEM100	0	0				TMEM100 [0/1]	PCTP [0/40]
20:21.7-22.6	PAX1	0	0				FOXA2 [0/1]	LINC00261 [0/19]
3:140.7-140.9	SLC25A36	0	0				SLC25A36 [0/23]	SPSB4 [0/43]
