# Supplementary material for: Genetic and climatic factors in the dispersal of Anatomically Modern Humans Out of Africa
Source: Research Square preprint supplement (doi:10.21203/rs.3.rs-800178/v1), 2021-08-24
Supplement: Supplementary file 7 [file f4b90832e287d76ad70abe5b.xlsx]

## Sheet: OxCal ranges
	Calibrated ages
Sample	1 sd range		2 sd range		Mean
Ust'Ishim	44946	43348	45924	42905	44364
Tianyuan	40313	39132	40845	38079	39565
Bacho Kiro 1653	35146	34746	35282	34616	34948
Bacho Kiro F6-597	36226	35874	36320	35600	36002
Kostenki 1	36588	36186	36879	36074	36430
Kosteniki 14	38841	37265	39375	36675	38052
Pestera cu Oase 1	40550	38100	41350	36960	39227
Bacho Kiro Cave AA7-738	43239	42709	43925	42585	43106
Bacho Kiro Cave BB7-240	45009	44329	45545	43945	44687
Bacho Kiro Cave CC7-2289	44078	43241	44395	42995	43689
Bacho Kiro Cave CC7-335	45423	44647	45924	44427	45117
Grotte du rennes at Arcy-sur-Cure	40238	39675	40509	39493	39984
les Cottes	40619	39967	40918	39696	40300
Labeko Koba	42150	41192	42514	40531	41587
Abric Romani	41347	40963	41611	40711	41159
Keilberg	43743	41900	44579	41295	42852
Riparo Mochi	42691	41075	44100	40060	41978
Goyet	35463	34920	35627	34720	35208
Sunghir 2	35200	34155	35782	33435	34629
Sunghir 3	35140	34046	35634	33277	34517
Sunghir 4	34470	33956	34699	33537	34173
Sunghir 1	33485	32200	34036	31843	32920
Yana Bone Layer	31538	31137	31793	31033	31382
Yana Bone Layer	32142	31116	33172	30943	31855
Vestonice	31052	30869	31134	30474	30929
Villabruna	14127	13863	14217	13800	14021
Bichon	13782	13610	13799	13528	13698
La Brana 1	7920	7746	7931	7690	7811
Loschbour	8156	7944	8170	7935	8025
Malta	24461	24175	24570	24120	24320
AfontovaGora2	16868	16663	16950	16589	16767
El Miron	18820	18741	18847	18696	18775
Satsurblia	13334	13188	13410	13174	13282
Grotte du Renne AR-14	42080	41276	42370	40778	41617
Saint-Césaire SP 28	41861	40697	42206	39960	41163
