# Supplementary material for: Genetic and climatic factors in the dispersal of Anatomically Modern Humans Out of Africa
Source: Research Square preprint supplement (doi:10.21203/rs.3.rs-800178/v1), 2021-08-24
Supplement: Supplementary file 8 [file fd444cdf7234321438bcd0bf.xlsx]

## Sheet: Driver_genes
Category	GO Term	Description	P-value	FDR q-value	Enrichment	N	B	n	b	Genes
Component	GO:0005858	axonemal dynein complex	0.000668	1	52.04	17744	22	31	2	[DNAH7 - dynein, axonemal, heavy chain 7, DNAH6 - dynein, axonemal, heavy chain 6]
Function	GO:0051020	GTPase binding	3.06e-05	0.141	9.62	17744	357	31	6	[ELMO1 - engulfment and cell motility 1, TBC1D7 - tbc1 domain family, member 7, MLPH - melanophilin, AMBRA1 - autophagy/beclin-1 regulator 1, ARFGEF1 - adp-ribosylation factor guanine nucleotide-exchange factor 1 (brefeldin a-inhibited), DOCK3 - dedicator of cytokinesis 3]
Function	GO:0008569	ATP-dependent microtubule motor activity, minus-end-directed	0.000444	1	63.6	17744	18	31	2	[DNAH7 - dynein, axonemal, heavy chain 7, DNAH6 - dynein, axonemal, heavy chain 6]
Function	GO:0045505	dynein intermediate chain binding	0.000935	1	44.03	17744	26	31	2	[DNAH7 - dynein, axonemal, heavy chain 7, DNAH6 - dynein, axonemal, heavy chain 6]
Process	GO:0001539	cilium or flagellum-dependent cell motility	0.000265	1	81.77	17744	14	31	2	[DNAH7 - dynein, axonemal, heavy chain 7, DNAH6 - dynein, axonemal, heavy chain 6]
Process	GO:0060285	cilium-dependent cell motility	0.000265	1	81.77	17744	14	31	2	[DNAH7 - dynein, axonemal, heavy chain 7, DNAH6 - dynein, axonemal, heavy chain 6]
Process	GO:2000114	regulation of establishment of cell polarity	0.000496	1	60.25	17744	19	31	2	[BCAS3 - breast carcinoma amplified sequence 3, ARFGEF1 - adp-ribosylation factor guanine nucleotide-exchange factor 1 (brefeldin a-inhibited)]
Process	GO:0032878	regulation of establishment or maintenance of cell polarity	0.000668	1	52.04	17744	22	31	2	[BCAS3 - breast carcinoma amplified sequence 3, ARFGEF1 - adp-ribosylation factor guanine nucleotide-exchange factor 1 (brefeldin a-inhibited)]

## Sheet: 8_collated
Table 8. Overrepresented GO terms that characterize 416 genes from the compendium
GO Term	Description	P-value	FDR q-value	Enrichment	Genes
GO:0044243	multicellular organismal catabolic process	3.77e-06	0.0567	6.32	[COL7A1 - collagen, type vii, alpha 1, CEL - carboxyl ester lipase, MMP1 - matrix metallopeptidase 1 (interstitial collagenase), COL5A3 - collagen, type v, alpha 3, ADAMTS14 - adam metallopeptidase with thrombospondin type 1 motif, 14, MMP27 - matrix metallopeptidase 27, COL4A4 - collagen, type iv, alpha 4, COL10A1 - collagen, type x, alpha 1, COL6A6 - collagen, type vi, alpha 6, COL6A1 - collage…
GO:0030574	collagen catabolic process	1.06e-05	0.0795	6.39	[COL7A1 - collagen, type vii, alpha 1, MMP1 - matrix metallopeptidase 1 (interstitial collagenase), COL5A3 - collagen, type v, alpha 3, ADAMTS14 - adam metallopeptidase with thrombospondin type 1 motif, 14, MMP27 - matrix metallopeptidase 27, COL4A4 - collagen, type iv, alpha 4, COL10A1 - collagen, type x, alpha 1, COL6A6 - collagen, type vi, alpha 6, COL6A1 - collagen, type vi, alpha 1]
GO:0003356	regulation of cilium beat frequency	4.12e-05	0.206	18.45	[DNAH11 - dynein, axonemal, heavy chain 11, CATSPER1 - cation channel, sperm associated 1, MKKS - mckusick-kaufman syndrome, DNAAF1 - dynein, axonemal, assembly factor 1]
GO:0032963	collagen metabolic process	5.21e-05	0.196	5.25	[COL7A1 - collagen, type vii, alpha 1, MMP1 - matrix metallopeptidase 1 (interstitial collagenase), COL5A3 - collagen, type v, alpha 3, ADAMTS14 - adam metallopeptidase with thrombospondin type 1 motif, 14, MMP27 - matrix metallopeptidase 27, COL4A4 - collagen, type iv, alpha 4, COL10A1 - collagen, type x, alpha 1, COL6A6 - collagen, type vi, alpha 6, COL6A1 - collagen, type vi, alpha 1]
GO:0003352	regulation of cilium movement	6.37e-05	0.191	16.77	[DNAH11 - dynein, axonemal, heavy chain 11, CATSPER1 - cation channel, sperm associated 1, MKKS - mckusick-kaufman syndrome, DNAAF1 - dynein, axonemal, assembly factor 1]
GO:0044236	multicellular organism metabolic process	8.05e-05	0.202	4.48	[COL7A1 - collagen, type vii, alpha 1, CEL - carboxyl ester lipase, MMP1 - matrix metallopeptidase 1 (interstitial collagenase), COL5A3 - collagen, type v, alpha 3, ADAMTS14 - adam metallopeptidase with thrombospondin type 1 motif, 14, MMP27 - matrix metallopeptidase 27, COL4A4 - collagen, type iv, alpha 4, COL6A6 - collagen, type vi, alpha 6, COL10A1 - collagen, type x, alpha 1, COL6A1 - collage…
GO:0044259	multicellular organismal macromolecule metabolic process	8.48e-05	0.182	4.94	[COL7A1 - collagen, type vii, alpha 1, MMP1 - matrix metallopeptidase 1 (interstitial collagenase), COL5A3 - collagen, type v, alpha 3, ADAMTS14 - adam metallopeptidase with thrombospondin type 1 motif, 14, MMP27 - matrix metallopeptidase 27, COL4A4 - collagen, type iv, alpha 4, COL10A1 - collagen, type x, alpha 1, COL6A6 - collagen, type vi, alpha 6, COL6A1 - collagen, type vi, alpha 1]
GO:1905515	non-motile cilium assembly	0.000112	0.211	7.69	[CEP250 - centrosomal protein 250kda, CSNK1D - casein kinase 1, delta, C2CD3 - c2 calcium-dependent domain containing 3, DYNC2H1 - dynein, cytoplasmic 2, heavy chain 1, CEP89 - centrosomal protein 89kda, MKKS - mckusick-kaufman syndrome]
GO:0097711	ciliary basal body docking	0.000238	0.397	4.32	[PCNT - pericentrin, CEP250 - centrosomal protein 250kda, SFI1 - sfi1 homolog, spindle assembly associated (yeast), CEP97 - centrosomal protein 97kda, CSNK1D - casein kinase 1, delta, TTBK2 - tau tubulin kinase 2, C2CD3 - c2 calcium-dependent domain containing 3, TCTN2 - tectonic family member 2, CEP89 - centrosomal protein 89kda]
GO:0030198	extracellular matrix organization	0.00027	0.405	2.65	[COL7A1 - collagen, type vii, alpha 1, MMP1 - matrix metallopeptidase 1 (interstitial collagenase), COL5A3 - collagen, type v, alpha 3, ADAMTS14 - adam metallopeptidase with thrombospondin type 1 motif, 14, ICAM4 - intercellular adhesion molecule 4 (landsteiner-wiener blood group), LAMA1 - laminin, alpha 1, LAMC3 - laminin, gamma 3, COL4A4 - collagen, type iv, alpha 4, COL6A1 - collagen, type vi,…
GO:0043062	extracellular structure organization	0.000281	0.383	2.64	[COL7A1 - collagen, type vii, alpha 1, MMP1 - matrix metallopeptidase 1 (interstitial collagenase), COL5A3 - collagen, type v, alpha 3, ADAMTS14 - adam metallopeptidase with thrombospondin type 1 motif, 14, ICAM4 - intercellular adhesion molecule 4 (landsteiner-wiener blood group), LAMA1 - laminin, alpha 1, LAMC3 - laminin, gamma 3, COL4A4 - collagen, type iv, alpha 4, COL6A1 - collagen, type vi,…
GO:0060632	regulation of microtubule-based movement	0.000652	0.816	9.71	[DNAH11 - dynein, axonemal, heavy chain 11, CATSPER1 - cation channel, sperm associated 1, MKKS - mckusick-kaufman syndrome, DNAAF1 - dynein, axonemal, assembly factor 1]
GO:0022406	membrane docking	0.000968	1	3.07	[PCNT - pericentrin, CEP250 - centrosomal protein 250kda, SFI1 - sfi1 homolog, spindle assembly associated (yeast), CEP97 - centrosomal protein 97kda, CSNK1D - casein kinase 1, delta, TTBK2 - tau tubulin kinase 2, C2CD3 - c2 calcium-dependent domain containing 3, VPS18 - vacuolar protein sorting 18 homolog (s. cerevisiae), TCTN2 - tectonic family member 2, CEP89 - centrosomal protein 89kda, VCAM1…

## Sheet: 10_collated
Table 10. Overrepresented GO terms that characterize 42 genes from the compendium, which are expressed mainly in lung
GO Term	Description	P-value	FDR q-value	Enrichment	Genes
GO:0006952	defense response	8.68e-05	1	4.22	[SPN - sialophorin, C4BPA - complement component 4 binding protein, alpha, CD180 - cd180 molecule, BPIFA1 - bpi fold containing family a, member 1, C5AR1 - complement component 5a receptor 1, CD163 - cd163 molecule, BPIFB1 - bpi fold containing family b, member 1, CYBA - cytochrome b-245, alpha polypeptide, IL1A - interleukin 1, alpha, MPO - myeloperoxidase]
GO:0003356	regulation of cilium beat frequency	0.000215	1	89.92	[CATSPER1 - cation channel, sperm associated 1, DNAAF1 - dynein, axonemal, assembly factor 1]
GO:0003352	regulation of cilium movement	0.000262	1	81.74	[CATSPER1 - cation channel, sperm associated 1, DNAAF1 - dynein, axonemal, assembly factor 1]
GO:0006955	immune response	0.00036	1	3.92	[SPN - sialophorin, PKHD1L1 - polycystic kidney and hepatic disease 1 (autosomal recessive)-like 1, C4BPA - complement component 4 binding protein, alpha, CD180 - cd180 molecule, BPIFA1 - bpi fold containing family a, member 1, C5AR1 - complement component 5a receptor 1, BPIFB1 - bpi fold containing family b, member 1, CYBA - cytochrome b-245, alpha polypeptide, IL1A - interleukin 1, alpha]
GO:0045730	respiratory burst	0.000498	1	59.94	[CYBA - cytochrome b-245, alpha polypeptide, MPO - myeloperoxidase]
GO:0002376	immune system process	0.000532	1	2.72	[MMP1 - matrix metallopeptidase 1 (interstitial collagenase), PLA2G3 - phospholipase a2, group iii, BPIFA1 - bpi fold containing family a, member 1, BPIFB1 - bpi fold containing family b, member 1, IL1A - interleukin 1, alpha, SPN - sialophorin, PKHD1L1 - polycystic kidney and hepatic disease 1 (autosomal recessive)-like 1, C4BPA - complement component 4 binding protein, alpha, CD180 - cd180 mole…
GO:0060632	regulation of microtubule-based movement	0.000722	1	49.95	[CATSPER1 - cation channel, sperm associated 1, DNAAF1 - dynein, axonemal, assembly factor 1]
GO:0004872	receptor activity	0.000555	1	3.09	[SPN - sialophorin, PKHD1L1 - polycystic kidney and hepatic disease 1 (autosomal recessive)-like 1, PTGIR - prostaglandin i2 (prostacyclin) receptor (ip), CD180 - cd180 molecule, ROS1 - c-ros oncogene 1 , receptor tyrosine kinase, C5AR1 - complement component 5a receptor 1, CD163 - cd163 molecule, SELPLG - selectin p ligand, APOBR - apolipoprotein b receptor, PTPRE - protein tyrosine phosphatase,…
GO:0060089	molecular transducer activity	0.000555	1	3.09	[SPN - sialophorin, PKHD1L1 - polycystic kidney and hepatic disease 1 (autosomal recessive)-like 1, PTGIR - prostaglandin i2 (prostacyclin) receptor (ip), CD180 - cd180 molecule, ROS1 - c-ros oncogene 1 , receptor tyrosine kinase, C5AR1 - complement component 5a receptor 1, CD163 - cd163 molecule, SELPLG - selectin p ligand, APOBR - apolipoprotein b receptor, PTPRE - protein tyrosine phosphatase,…
GO:0001931	uropod	0.000314	0.574	74.93	[SPN - sialophorin, SELPLG - selectin p ligand]
GO:0005576	extracellular region	0.000409	0.374	2.98	[MMP1 - matrix metallopeptidase 1 (interstitial collagenase), PLA2G3 - phospholipase a2, group iii, ICAM4 - intercellular adhesion molecule 4 (landsteiner-wiener blood group), C4BPA - complement component 4 binding protein, alpha, LAMC3 - laminin, gamma 3, BPIFA1 - bpi fold containing family a, member 1, CD163 - cd163 molecule, VCAN - versican, COL6A6 - collagen, type vi, alpha 6, IL1A - interleu…

## Sheet: 6_Fumagalli
Table 6. Significantly enriched gene ontology categories based on the ranking of the maximum PBS score of human genes (P < 0.01, FDR q-value < 0.1, enrichment score > 5).
GO term	Description	P-value	FDR q-value	Enrichment score (N,B,n,b)	Genes
GO:0050925	negative regulation of negative chemotaxis	1.18e-06	0.00698	1,226.89 (11042,2,9,2)	ROBO1, ROBO2
GO:0001539	cilium or flagellum -dependent cell motility	2.63e-06	0.0104	167.30 (11042,9,22,3)	DNAH17, DNAH3, DNAH2
GO:0016199	axon midline choice point recognition	1.04e-05	0.0205	613.44 (11042,4,9,2)	ROBO1, ROBO2
GO:0016198	axon choice point recognition	1.04e-05	0.0175	613.44 (11042,4,9,2)	ROBO1, ROBO2
GO:0050923	regulation of negative chemotaxis	1.04e-05	0.0153	613.44 (11042,4,9,2)	ROBO1, ROBO2
GO:1901522	positive regulation of transcription from RNA polymerase II promoter involved in cellular response to chemical stimulus	1.37e-05	0.018	37.12 (11042,10,119,4)	CHD6, EP300, ATF6, NCOA1
GO:0060039	pericardium development	2.82e-05	0.0303	24.87 (11042,6,296,4)	CCM2, SETD2, HEG1, RPGRIP1L
GO:0030240	skeletal muscle thin filament assembly	7.25e-05	0.0715	164.81 (11042,2,67,2)	TCAP, TTN
GO:0034651	cortisol biosynthetic process	0.000118	0.0995	147.23 (11042,3,50,2)	CYP11B2, CYP11B1
GO:0032341	aldosterone metabolic process	0.000118	0.0929	147.23 (11042,3,50,2)	CYP11B2, CYP11B1
GO:0032342	aldosterone biosynthetic process	0.000118	0.0871	147.23 (11042,3,50,2)	CYP11B2, CYP11B1
GO:0006705	mineralocorticoid biosynthetic process	0.000118	0.0819	147.23 (11042,3,50,2)	CYP11B2, CYP11B1
GO:0008212	mineralocorticoid metabolic process	0.000118	0.0774	147.23 (11042,3,50,2)	CYP11B2, CYP11B1
GO:0035994	response to muscle stretch	0.000126	0.0787	41.20 (11042,6,134,3)	RYR2, TCAP, TTN
GO:0035995	detection of muscle stretch	0.000209	0.0987	109.87 (11042,3,67,2)	TCAP, TTN
Note: The enrichment score is equal to (b/n) / (B/N), where N is the total number of genes, B is the number of genes associated with a category, n is the number of genes at the top of the ranked list (as defined by the mHG method) and b is the number of genes in the intersection of n and B. We find that several categories are significant because they each contain two genes that are contiguous. Th…

## Sheet: 8_Cardano
Population	Test	GO-term	EASE score	FDR	GO Name	# of windows in which GO term appears in top 1%	Genes directly associated with the GO-term
ABST	iHS	GO:0044093	0.00026738	0.0913459	positive regulation of molecular function	23
ABST	iHS	GO:0043085	0.000724019	0.0913459	positive regulation of catalytic activity	20
ABST	iHS	GO:0051345	0.000909974	0.0913459	positive regulation of hydrolase activity	14
ABST	iHS	GO:0001934	0.00286148	0.0913459	positive regulation of protein phosphorylation	9	DOK7 AIF1 TNF ERBB4 ADAM17
ABST	iHS	GO:0033674	0.00299683	0.0913459	positive regulation of kinase activity	12
ABST	iHS	GO:0006950	0.00338468	0.0913459	response to stress	29	MAPK1 HSPA1L HSPA1A
ABST	iHS	GO:0051347	0.00345811	0.0913459	positive regulation of transferase activity	12
ABST	iHS	GO:0030334	0.00372579	0.0913459	regulation of cell migration	11	ERBB4
ABST	iHS	GO:0048583	0.00413045	0.0971935	regulation of response to stimulus	29
ABST	iHS	GO:0042327	0.00443122	0.0913459	positive regulation of phosphorylation	9
ABST	iHS	GO:0030335	0.0049844	0.0913459	positive regulation of cell migration	8	ADAM17 MAPK1 AIF1 CREB3L4 VIL1 ERBB4
ABST	iHS	GO:2000145	0.00521248	0.0913459	regulation of cell motility	11
ABST	iHS	GO:0045937	0.00543183	0.0913459	positive regulation of phosphate metabolic process	9
ABST	iHS	GO:0010562	0.00543183	0.0913459	positive regulation of phosphorus metabolic process	9
ABST	iHS	GO:2000147	0.00543468	0.0913459	positive regulation of cell motility	8
ABST	iHS	GO:0051336	0.00550563	0.0971935	regulation of hydrolase activity	16
ABST	iHS	GO:0002274	0.00576797	0.0913459	myeloid leukocyte activation	5
ABST	iHS	GO:0045860	0.00648183	0.0971935	positive regulation of protein kinase activity	11	EPX JTB
ABST	iHS	GO:0040017	0.0067856	0.0913459	positive regulation of locomotion	8
ABST	iHS	GO:0009966	0.00685415	0.115772	regulation of signal transduction	24
ABST	iHS	GO:0051272	0.00697064	0.0913459	positive regulation of cellular component movement	8	ADAM17
ABST	iHS	GO:0050921	0.00752335	0.0913459	positive regulation of chemotaxis	5	PPM1F
ABST	iHS	GO:0065009	0.00767142	0.115772	regulation of molecular function	26
ABST	iHS	GO:0051270	0.00783538	0.101248	regulation of cellular component movement	11
ABST	iHS	GO:0040012	0.00874733	0.111194	regulation of locomotion	11
ABST	iHS	GO:0033554	0.00955691	0.115772	cellular response to stress	17
ABST	iHS	GO:0006913	0.00974553	0.0971935	nucleocytoplasmic transport	7	CAMK4 NSRP1
ABST	iHS	GO:0009628	0.00991857	0.115772	response to abiotic stimulus	13
EEY	iHS	GO:0051130	0.000124335	0.0411907	positive regulation of cellular component organization	16
EEY	iHS	GO:0051270	0.00109146	0.0900146	regulation of cellular component movement	14
EEY	iHS	GO:0044260	0.00111843	0.0900146	cellular macromolecule metabolic process	55
EEY	iHS	GO:0051128	0.00134213	0.0900146	regulation of cellular component organization	24
EEY	iHS	GO:0030334	0.0013943	0.0900146	regulation of cell migration	13	MINK1 SGK1 ERBB4
EEY	iHS	GO:2000145	0.00199835	0.0900146	regulation of cell motility	13
EEY	iHS	GO:0048522	0.00224762	0.0900146	positive regulation of cellular process	42
EEY	iHS	GO:0032879	0.00226865	0.0900146	regulation of localization	25
EEY	iHS	GO:0043254	0.00275649	0.0900146	regulation of protein complex assembly	8
EEY	iHS	GO:0019538	0.00315943	0.0900146	protein metabolic process	39	OTUB1 NUMBL
EEY	iHS	GO:0009966	0.00352046	0.0900146	regulation of signal transduction	28
EEY	iHS	GO:0032271	0.0036567	0.0900146	regulation of protein polymerization	6
EEY	iHS	GO:0040012	0.00377309	0.0900146	regulation of locomotion	13
EEY	iHS	GO:0043170	0.00420701	0.0961991	macromolecule metabolic process	56
EEY	iHS	GO:0044267	0.00460301	0.0900146	cellular protein metabolic process	34	DPM3 MUC1 MTX1 RPL14 SRPRB RPS7 B3GNT5 PIGQ SRP19
EEY	iHS	GO:0007166	0.00461101	0.0900146	cell surface receptor signaling pathway	32	IGSF6 CXCR1 CXCR2 GP1BA
EEY	iHS	GO:0048518	0.0050005	0.0961991	positive regulation of biological process	43
EEY	iHS	GO:0045664	0.00567077	0.0900146	regulation of neuron differentiation	11	C5orf13
EEY	iHS	GO:0050767	0.00602042	0.0900146	regulation of neurogenesis	12
EEY	iHS	GO:0023051	0.00608398	0.0973526	regulation of signaling	30
EEY	iHS	GO:0031346	0.00647654	0.0900146	positive regulation of cell projection organization	7
EEY	iHS	GO:0010769	0.00684164	0.0900146	regulation of cell morphogenesis involved in differentiation	8
EEY	iHS	GO:0022604	0.00744892	0.0900146	regulation of cell morphogenesis	10
EEY	iHS	GO:0030833	0.00836417	0.0900146	regulation of actin filament polymerization	5	ARPC2 CORO1A
EEY	iHS	GO:0048869	0.00836936	0.101677	cellular developmental process	30
EEY	iHS	GO:0042127	0.00840227	0.099871	regulation of cell proliferation	22	SGK1 NR3C1 CFDP1
EEY	iHS	GO:0000904	0.00898062	0.0900146	cell morphogenesis involved in differentiation	6	RELN
EEY	iHS	GO:0040008	0.00940365	0.0973526	regulation of growth	13	HEPACAM
EEY	iHS	GO:0006605	0.00949671	0.0961991	protein targeting	10	YWHAQ
EEY	iHS	GO:0042325	0.00993795	0.099871	regulation of phosphorylation	18
CEK	iHS	GO:0006886	0.000904647	0.0664678	intracellular protein transport	15	SEC23IP COG3 VPS16 RAMP2 UNC93B1
CEK	iHS	GO:0007018	0.000931053	0.0664678	microtubule-based movement	8	DNAH14 KLC2 DNAH11
CEK	iHS	GO:0015031	0.00226453	0.122882	protein transport	20	VPS25 RAMP2 RABEP2 RAB1B ARF5 EXOC6 COG1 COG3 YIF1A DMBT1
CEK	iHS	GO:0010970	0.00245759	0.0664678	microtubule-based transport	5
CEK	iHS	GO:0060249	0.0026133	0.0800995	anatomical structure homeostasis	8
CEK	iHS	GO:0045184	0.00274501	0.126234	establishment of protein localization	20
CEK	iHS	GO:0046907	0.00292935	0.126234	intracellular transport	19
CEK	iHS	GO:0034645	0.00310131	0.146365	cellular macromolecule biosynthetic process	33
CEK	iHS	GO:0051649	0.00333033	0.145866	establishment of localization in cell	23
CEK	iHS	GO:0008088	0.00336051	0.0664678	axon cargo transport	4	KLC2 CNTNAP1 SLC6A4
CEK	iHS	GO:0030705	0.0034118	0.0664678	cytoskeleton-dependent intracellular transport	5
CEK	iHS	GO:0009059	0.00403087	0.177016	macromolecule biosynthetic process	33
CEK	iHS	GO:0006891	0.00479382	0.0664678	intra-Golgi vesicle-mediated transport	4	COG3 COG1
CEK	iHS	GO:0007165	0.00864281	0.193065	signal transduction	42	ARHGAP8 CHKA RIN1 ESR2 P2RX3 GNL1 IGF2R SPNS1 TNFSF18 PLEKHH3 PRR5-ARHGAP8 TNFSF4 MAP2K5 LAT PRKG1 MCC TOLLIP CNTNAP1 SPARCL1 ERBB4 TANK
ABST	XP-EHH	GO:0045620	0.00770955	0.482023	negative regulation of lymphocyte differentiation	4
CEK	XP-EHH	GO:0006952	0.00204605	0.324337	defense response	18	MX2 ICOSLG CRISP3
